# Supplementary material for: Identification of a direct interaction between the Fab domains of IgG antibodies and human FcRn upon IgG-FcRn complex formation
Source: Springer Nature journal article supplement (doi:10.1038/s42003-025-08252-z), 2025-06-12
Supplement: MOESM1 [file 42003_2025_8252_MOESM1_ESM.pdf]

## Supplemental Information

Identification of a direct interaction between the Fab domains of IgG antibodies and human FcRn upon IgG-FcRn complex formation

**Esben Trabjerg<sup>1,#</sup>, Jeannette Nilsen<sup>3,4,5</sup>, Torleif Tollefsrud Gjølberg<sup>3,4,5</sup>, Jan Terje Andersen<sup>3,4,5</sup>, Alexander Leitner<sup>1</sup> and Kasper D. Rand<sup>2,\*</sup>**

<sup>1</sup>Department of Biology, Institute of Molecular Systems Biology, ETH Zürich, Zurich, Switzerland

<sup>2</sup>Department of Pharmacy, University of Copenhagen, Copenhagen, Denmark

<sup>3</sup>Precision Immunotherapy Alliance (PRIMA), University of Oslo, Oslo, Norway

<sup>4</sup>Department of Immunology, Oslo University Hospital Rikshospitalet and University of Oslo, Oslo, Norway

<sup>5</sup>Institute of Clinical Medicine, Department of Pharmacology, University of Oslo and Oslo University Hospital, Oslo, Norway

#current address: Department of Pharmacy, University of Copenhagen, Copenhagen, Denmark

\*To whom correspondence should be addressed.

## Table of Contents

Page S-3: **Supplemental Methods**

Page S-4: **Table S1** – Table of identified cross-links, including overview of identified fragment ions.

Page S-6: **Table S2** – Identification of overlength cross-links between Fab domains and the Fc part of C-mAb.

Page S-7: **Table S3** – Cross-links only observed in a single experimental condition or only observed in the FcRn:mutC-mAb complex.

Page S-8: **Table S4** – Identified inter protein cross-links between IdeZ-treated mAbs and FcRn

Page S-9: **Table S5** – Overview of recorded HDX data.

Page S-10: **Figure S1** – Alignment of HCs of H-mAb with C-mAb and HC of H-mAb with Fc-YTE.

Page S-11: **Figure S2** – Alignment of LCs of H-mAb and C-mAb.

Page S-12: **Figure S3** – Charge distribution and pH-dependent net charge of the Fab domains of H-mAb and C-mAb.

Page S-13: **Figure S4** – Conformational flexibility of full-length IgGs.

Page S-14: **Figure S5** – Visualization of cross-links identified in the complex between mutC-mAb and FcRn.

Page S-15: **Figure S6** – Observation of higher order oligomers after cross-linking a solution of FcRn and C-mAb

Page S-16: **Figure S7** – DisVis analysis of mAbs Fab domain interaction with FcRn.

Page S-17: **Figure S8** – Effective HDX-MS coverage map of H-mAb.

Page S-18: **Figure S9** – Effective HDX-MS coverage map of C-mAb.

Page S-19: **Figure S10** – HDX plots of H-mAb in the absence and presence of FcRn.

Page S-23: **Figure S11** – HDX plots of C-mAb in the absence and presence of FcRn.

Page S-26: **Figure S12** – Effective HDX-MS coverage map of FcRn.

Page S-27: **Figure S13** – HDX plots of FcRn in the absence and presence of either H-mAb or C-mAb (exchange time: 2.09 min to 1507.13 min).

Page S-29: **Figure S14** – Conformational response of the complex formation of FcRn and C-mAb.

Page S-30: **Figure S15** – HDX plots of FcRn in the absence and presence of either H-mAb or C-mAb (exchange time: 13 s to 2.09 min).

Page S-33: **Figure S16** – SDS-PAGE of IdeZ treated C-mAb.

Page S-34: **Supplemental References**

## Supplemental Methods

*Calculation and visualization of surface charge:* Surface charge analysis was done based on the crystal structures of the Fab domains of H-mAb and C-mAb (PDB ID: 4NYL and 1NGP). The surface charge maps were generated by the pdb2pqr (3.6.1) and APBS (3.4.1) servers (<https://server.poissonboltzmann.org/pdb2pqr>) with standard settings. The protonation states of side chains were calculated by the PROPKA algorithm and the PARSE forcefield was used. The resulting surface potential maps were visualised at  $\pm 3k_B T/e$  in PyMOL (2.5.2). The sequence based pH-dependent net charge of the Fab domains of H-mAb and C-mAb were calculated using the Emboss iep calculator ([http://www.bioinformatics.nl/cgi-bin/emboss/iep?\\_pref\\_hide\\_optional=0](http://www.bioinformatics.nl/cgi-bin/emboss/iep?_pref_hide_optional=0)).<sup>1</sup> All cysteines were assumed to form disulfide bridges and the Fab domains were set to contain 2 N-terminals and 1 C-termini.

*In-gel digestion of C-mAb:* The SDS-PAGE band corresponding to monomeric C-mAb was sliced of the gel, cut into smaller pieces, placed in a Eppendorf tube, solvated with 200  $\mu$ L 25 mM  $\text{NH}_4\text{HCO}_3$  in 50:50 MQ water:acetonitrile, and incubated at 37 °C under shaking for 30 min. The supernatant was discarded and the process was repeated twice to de-stain the gel pieces. The gel pieces were dehydrated with 100  $\mu$ L acetonitrile, washed with 100  $\mu$ L MQ water, dehydrated with 100  $\mu$ L acetonitrile before addition of 100  $\mu$ L 6.5 mM dithiothreitol in MQ water and incubated at 60 °C under shaking for 60 min to ensure efficient reduction of C-mAb. The solvent was discarded and the gel pieces were dehydrated in 100  $\mu$ L acetonitrile before addition of 100  $\mu$ L 54 mM iodoacetamide in MQ water and incubated at 25 °C in the dark under shaking for 30 min to alkylate C-mAb. The solvent was discarded and the gel pieces were dehydrated with 100  $\mu$ L acetonitrile and hydrated with 50 mM  $\text{NH}_4\text{HCO}_3$  in MQ water. This process was repeated 3 times, and the gel pieces were dehydrated a final time in 100  $\mu$ L acetonitrile. The supernatant was discarded and the dehydrated gel pieces were hydrated in 100  $\mu$ L of 10 ng/ $\mu$ L trypsin solution in 50 mM  $\text{NH}_4\text{HCO}_3$ . The gel pieces were incubated overnight at 37 °C under shaking. The next morning the supernatant was collected. The gel pieces were covered in 40  $\mu$ L 0.1 % formic acid in MQ water and incubated for 15 min at room temperature under shaking. The supernatant was collected. The gel pieces were covered in 40  $\mu$ L of a 50:50 mixture of 0.1 % formic acid in MQ water and acetonitrile and incubated for 15 min at room temperature under shaking. The supernatant was collected. The gel pieces were covered in 40  $\mu$ L acetonitrile and incubated for 15 min at room temperature under shaking. All collected supernatants were pooled and evaporated to dryness in a vacuum centrifuge. The samples were re-suspended in 20  $\mu$ L SEC running buffer, purified by SEC and analyzed by LC-MS as described for XL-MS samples in the methods section.

**Supporting Table S1. Table of identified cross-links including overview of identified fragment ions.** A “Z”-residue denotes the end amino group on the N-terminal of a protein chain (cross-link number 8).

|   | Residue 1         | Residue 2     | Peptide 1       | Peptide 2          | Id-Score | Euclidean C $\alpha$ -C $\alpha$ distance (Å) | Identified fragments ions                                                                      |
|---|-------------------|---------------|-----------------|--------------------|----------|-----------------------------------------------|------------------------------------------------------------------------------------------------|
|   |                   |               |                 |                    |          |                                               | Red: fragment ion containing cross-linker,<br>Green: Fragment ions not containing cross-linker |
| 1 | $\beta$ 2m - K91  | Fc HC - K292  | VNHVTLSQPKIVK   | FNWYVDGVEVHNAKTkPR | 34.11    | 16.8                                          |             |
| 2 | $\beta$ 2m - K91  | Fc HC - K294  | VNHVTLSQPKIVK   | FNWYVDGVEVHNAKTkPR | 36.36    | 20.5                                          |             |
| 3 | $\beta$ 2m - K6   | Fc HC - K292  | TPKIQVYSR       | FNWYVDGVEVHNAKTkPR | 33.26    | 24.0                                          |            |
| 4 | $\alpha$ 3 - K243 | Fab HC - K217 | DGSFHASSSLTVKSG | DKKVEPKSC          | 36.16    |                                               |           |

|   |                   |                      |                 |                  |       |                                                                                      |
|---|-------------------|----------------------|-----------------|------------------|-------|--------------------------------------------------------------------------------------|
| 5 | $\alpha$ 3 - K243 | Fab HC - K218        | DGSFHASSSLTVKSG | DKKVEPKSC        | 40.56 | 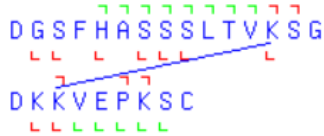  |
| 6 | $\beta$ 2m - K91  | Fab HC - K59         | VNHVTLSQPKIVK   | IDPNSGGTKYNEK    | 33.41 |   |
| 7 | $\beta$ 2m - K94  | Fab HC – K59         | IVKWDRDM        | IDPNSGGTKYNEK    | 37.86 |   |
| 8 | $\beta$ 2m - K91  | Fab HC – E1 (N-term) | VNHVTLSQPKIVK   | EVQLVESGGGLVQPGR | 32.60 |  |

**Supporting Table S2. Identification of overlenght cross-links between Fab domains and the Fc part of C-mAb.** C-mAb was cross-linked with DSS as described in the methods section. After cross-linking the cross-linking products where seperated on an SDS-PAGE as described in the methods section. The band corresponding to monomeric C-mAb was sliced out of the gel and in-gel digestion with LysC and trypsin was performed, see supporting methods. The released peptides were analysed by LC-MS as described in the methods section. 5 overlenght cross-links where identified highlighting the flexibility of the Fab domains in C-mAb. The Euclidan distances where determined in Pymol on the homology model of C-mAb. The highest Id-score observed across all data sets is shown.

| Residue 1                | Residue 2 | Id-Score | Replicates | Euclidean C $\alpha$ -C $\alpha$ distance (Å) |
|--------------------------|-----------|----------|------------|-----------------------------------------------|
| <i>non overlenght XL</i> |           |          |            |                                               |
| HC - 137                 | LC - 207  | 25.19    | 1/2        | 11.1                                          |
| HC - 137                 | HC - 218  | 36.4     | 2/2        | 19.9                                          |
| HC - 137                 | HC - 222  | 28.98    | 2/2        | 10.6                                          |
| HC - 218                 | LC - 207  | 32.8     | 1/2        | 24.5                                          |
| HC - 364                 | HC - 418  | 39.9     | 2/2        | 7.8                                           |
| <i>Overlenght XL</i>     |           |          |            |                                               |
| HC - 59                  | HC - 344  | 31.75    | 1/2        | 88.3                                          |
| HC - 59                  | HC - 418  | 37.59    | 2/2        | 79.5                                          |
| HC - 137                 | HC - 330  | 32.54    | 2/2        | 39.8                                          |
| LC - 207                 | HC - 344  | 37.94    | 1/2        | 60.0                                          |
| HC - 63                  | HC - 418  | 32.22    | 1/2        | 76.0                                          |

**Supporting Table S3. Cross-links only observed in a single experimental condition or only observed in the FcRn:mutC-mAb complex.** The abbreviation in the “Residue 1 and 2” columns refers to the domains of FcRn ( $\alpha 1$ ,  $\alpha 2$ ,  $\alpha 3$  or  $\beta 2m$ ) and IgGs (LC or HC). The “Complex” column refers to in which complex the cross-link have been identified. The “Chemistry” column refers to the cross-linking chemistry applied. The “Enzymes” column refers to the used proteases. The “Id-Score / FDR” refers to the Id-score in xQuest, while the FDR was calculated in xProphet. The “n-seen” column refers to number of spectrums, where the cross-link was identified.

|    | Residue 1          | Residue 2    | Complex                                     | Chemistry | Enzymes     | Id-Score / FDR | n-seen |
|----|--------------------|--------------|---------------------------------------------|-----------|-------------|----------------|--------|
| 1  | $\beta 2m$ - 6     | HC - 292/294 | FcRn:H-mAb                                  | DSS       | LysC + Tryp | 33.26          | 1      |
| 2  | $\alpha 2$ - 146   | HC - 76      | FcRn:H-mAb                                  | DSS       | LysC + Tryp | 40.74          | 3      |
| 3  | $\beta 2m$ - 91    | HC - 418     | FcRn:H-mAb,<br>FcRn:C-mAb,<br>FcRn:mutC-mAb | DSS       | LysC + Tryp | 36.08          | 1      |
| 4  | $\beta 2m$ - 91    | LC - 145     | FcRn:H-mAb                                  | DSS       | LysC + Tryp | 26.16          | 1      |
| 5  | $\alpha 2$ - 146   | HC - 418     | FcRn:H-mAb                                  | DSS       | LysC + Tryp | 26.83          | 1      |
| 6  | $\alpha 2$ - 146   | LC - 1       | FcRn:H-mAb                                  | DSS       | LysC + Tryp | 37.38          | 1      |
| 7  | $\beta 2m$ - 91    | LC - 107     | FcRn:H-mAb                                  | DSS       | LysC + Tryp | 37.4           | 1      |
| 8  | $\beta 2m$ - 91    | LC - 188     | FcRn:H-mAb                                  | DSS       | LysC + Tryp | 39.09          | 1      |
| 9  | $\alpha 2$ - 177   | LC - 1       | FcRn:H-mAb                                  | DSS       | LysC + Tryp | 30.76          | 1      |
| 10 | $\alpha 1$ - 59    | HC - 74      | FcRn:C-mAb                                  | DSS       | LysC + Tryp | 25.11          | 2      |
| 11 | $\beta 2m$ - 91    | HC - 278     | FcRn:H-mAb                                  | DSS       | AspN        | 36.12          | 3      |
| 12 | $\beta 2m$ - 41    | HC - 343     | FcRn:H-mAb                                  | DSS       | AspN        | 25.63          | 1      |
| 13 | $\beta 2m$ - 94    | HC - 278     | FcRn:H-mAb                                  | DSS       | AspN        | 27.71          | 1      |
| 14 | $\beta 2m$ - 94    | HC - 46      | FcRn:H-mAb                                  | PDH-ZL    | LysC + Tryp | 23.24 / 0      | 2      |
| 15 | $\alpha 2$ - 146   | LC - 207     | FcRn:mutC-mAb                               | DSS       | LysC + Tryp | 29.28          | 1      |
| 16 | $\beta 2m$ - 48    | LC - 72      | FcRn:mutC-mAb                               | DSS       | AspN        | 28.16          | 1      |
| 17 | $\beta 2m$ - 91    | HC - 217/218 | FcRn:mutC-mAb                               | DSS       | AspN        | 27.01          | 1      |
| 18 | $\alpha 1$ - 67    | LC - 206     | FcRn:mutC-mAb                               | XP        | LysC + Tryp | 37.77          | 1      |
| 19 | $\alpha 2$ - 168   | LC - 163     | FcRn:mutC-mAb                               | XP        | LysC + Tryp | 36.52          | 1      |
| 20 | $\alpha 2$ - 178   | LC71         | FcRn:mutC-mAb                               | XP        | LysC + Tryp | 27.43          | 1      |
| 21 | $\beta 2m$ - 77    | HC - 46      | FcRn:mutC-mAb                               | XP        | LysC + Tryp | 37.93          | 1      |
| 22 | $\alpha 1$ - 54/62 | HC - 237     | FcRn:mutC-mAb                               | XP        | AspN        | 32.05          | 2      |
| 23 | $\beta 2m$ - 38    | HC - 262/269 | FcRn:mutC-mAb                               | PDH       | LysC + Tryp | 29.43          | 2      |
| 24 | $\alpha 1$ - 71    | LC - 71      | FcRn:mutC-mAb                               | XP-ZL     | LysC + Tryp | 40.88 / 0      | 2      |
| 25 | $\beta 2m$ - 50/53 | HC - 217/218 | FcRn:mutC-mAb                               | XP-ZL     | LysC + Tryp | 37.36 / 0      | 1      |
| 26 | $\beta 2m$ - 50    | HC - 330     | FcRn:mutC-mAb                               | XP-ZL     | LysC + Tryp | 37.29 / 0      | 1      |
| 27 | $\beta 2m$ - 53    | HC - 330     | FcRn:mutC-mAb                               | XP-ZL     | LysC + Tryp | 33.76 / 0      | 1      |
| 28 | $\beta 2m$ - 48    | LC - 206     | FcRn:mutC-mAb                               | XP-ZL     | LysC + Tryp | 33.56 / 0      | 1      |
| 29 | $\beta 2m$ - 94    | LC - 201/206 | FcRn:mutC-mAb                               | XP-ZL     | LysC + Tryp | 31.95 / 0      | 2      |
| 30 | $\alpha 1$ - 71    | LC - 80      | FcRn:mutC-mAb                               | XP-ZL     | LysC + Tryp | 31.57 / 0      | 1      |
| 31 | $\alpha 2$ - 178   | HC - 418     | FcRn:mutC-mAb                               | XP-ZL     | LysC + Tryp | 30.09 / 0.05   | 2      |
| 32 | $\alpha 2$ - 145   | HC - 67      | FcRn:mutC-mAb                               | XP-ZL     | LysC + Tryp | 26.89 / 0      | 1      |
| 33 | $\alpha 2$ - 165   | HC - 330     | FcRn:mutC-mAb                               | XP-ZL     | LysC + Tryp | 31.24 / 0      | 3      |
| 34 | $\beta 2m$ - 50    | HC 324/326   | FcRn:mutC-mAb                               | PDH-ZL    | LysC + Tryp | 24.37 / 0      | 4      |

**Supporting Table S4. Identified inter protein cross-links between IdeZ-treated mAbs and FcRn.** The identified cross-links below all belong to the IdeZ treated mutC-mAb in complex with FcRn, confirming the experimental conditions. As no interprotein cross-links have been identified between the Fc-part of an mAb and FcRn in a AspN digest in the current study this is expected. The Euclidean distances were determined in Pymol on the homology model of C-mAb. The highest Id-score observed across all data sets is shown

|   | Residue 1        | Residue 2    | Id-Score | Euclidean C $\alpha$ -C $\alpha$ distance (Å) |
|---|------------------|--------------|----------|-----------------------------------------------|
| 1 | $\beta$ 2m - K91 | Fc HC - K292 | 34.37    | 16.8                                          |
| 2 | $\beta$ 2m - K91 | Fc HC - K294 | 36.59    | 20.5                                          |
| 3 | $\beta$ 2m - K6  | Fc HC - K294 | 35.79    | 24.0                                          |



**Supporting Table S5. Overview of recorded HDX data.** The numbers in the table refers to the number of replicate(s) of recorded HDX data for every single time point at every condition. N/A: Not applicable.

| Experiment | Protein | Ligand      | Molar Excess of Ligand | 13 s | 25 s | 38 s | 2.09 min | 6min 17s | 25min 7s | 3t 25min 45s | 4t 11min 11s | 1d 1t 7min 8s | Maximally labelled samples |
|------------|---------|-------------|------------------------|------|------|------|----------|----------|----------|--------------|--------------|---------------|----------------------------|
| I          | FcRn    | Not present | N/A                    |      |      |      | 3        | 3        | 3        |              | 3            | 3             | 3                          |
|            | FcRn    | H-mAb       | 7 times                |      |      |      | 3        | 1        | 1        |              | 1            | 1             |                            |
|            | FcRn    | C-mAb       | 7 times                |      |      |      | 3        | 3        | 3        |              | 3            | 3             |                            |
| II         | FcRn    | Not present | N/A                    | 3    | 3    | 3    | 3        |          |          |              |              |               | 3                          |
|            | FcRn    | H-mAb       | 7 times                | 3    | 3    | 3    | 3        |          |          |              |              |               |                            |
|            | FcRn    | C-mAb       | 7 times                | 3    | 3    | 3    | 3        |          |          |              |              |               |                            |
| III        | H-mAb   | Not present | N/A                    |      |      |      | 3        | 1        | 1        | 1            |              |               | 1                          |
|            | H-mAb   | FcRn        | 7 times                |      |      |      | 3        | 1        | 1        | 1            |              |               |                            |
| IV         | C-mAb   | Not present | N/A                    |      |      |      | 3        | 3        | 3        |              | 3            | 3             |                            |
|            | C-mAb   | FcRn        | 7 times                |      |      |      | 3        | 3        | 3        |              | 3            | 3             | 3                          |

**A)**

Identities:391/451(87%), Positives:415/451(92%), Gaps:1/451(0%)

|       |     |                                                                   |     |
|-------|-----|-------------------------------------------------------------------|-----|
| H-mAb | 1   | EVQLVESGGGLVQPGRSRLRLSCAASGFTFDDYAMHWVRQAPGKGLEWVSAITWNSGHIDY     | 60  |
| C-mAb | 1   | +VQL + G LV+PG S++LSC ASG+TF Y MHWV+Q PG+GLEW+ I NSG Y            | 60  |
| H-mAb | 61  | QVQLQQPGAELVKPGASVKLSCKASGYTFTSYWMHWVKQRPGRGLEWIGRIDPNSGGTKY      | 60  |
| C-mAb | 61  | ADSV EGRFTISRDN AKNSLYLQMN SLRAEDTAVYYCAKVS YLSTASSLDYWGQGT LTVTS | 120 |
| H-mAb | 61  | + + + T++ D ++ Y+Q++SL +ED+AVYYCA+ Y +S DYWGQGT +TVS              | 120 |
| C-mAb | 61  | NEKFKSKATLTVDKPSSTAYMQLSSLTSEDSAVYYCARYDYYG-SSYFDYWGQGTTLTVS      | 120 |
| H-mAb | 121 | SASTKGPSVFPLAPSSKSTSGGTAALGCLVKDYFPEPVTVSWNSGALTSGVHTFPAVLQS      | 180 |
| C-mAb | 121 | SASTKGPSVFPLAPSSKSTSGGTAALGCLVKDYFPEPVTVSWNSGALTSGVHTFPAVLQS      | 180 |
| H-mAb | 181 | SGLYSLSSVVTVPSSSLGTQTYICNVNHKPSNTKVDKKVEPKSCDKTHTCPPCPAPELLG      | 240 |
| C-mAb | 181 | SGLYSLSSVVTVPSSSLGTQTYICNVNHKPSNTKVDKKVEPKSCDKTHTCPPCPAPELLG      | 240 |
| H-mAb | 241 | GPSVFLFPPKPKDTLMISRTPEVTCVVDVSHEDPEVKFNWYVDGVEVHNAKTKPREEQY       | 300 |
| C-mAb | 241 | GPSVFLFPPKPKDTLMISRTPEVTCVVDVSHEDPEVKFNWYVDGVEVHNAKTKPREEQY       | 300 |
| H-mAb | 301 | GSTYRVSVLTIVLHQLDNLNGKEYKCKVSNKALPAPIEKTISKAKGQPREPQVYTLPPSRD     | 360 |
| C-mAb | 301 | NSTYRVSVLTIVLHQLDNLNGKEYKCKVSNKALPAPIEKTISKAKGQPREPQVYTLPPSRD     | 360 |
| H-mAb | 361 | ELTKNQVSLTCLVKGFYPSDIAVEWESNGQPENNYKTPPVLDSDGSFFLYSKLTVDKSR       | 420 |
| C-mAb | 361 | ELTKNQVSLTCLVKGFYPSDIAVEWESNGQPENNYKTPPVLDSDGSFFLYSKLTVDKSR       | 420 |
| H-mAb | 421 | WQQGNVFSCSVMHEALHNHYTQKSLSLSPG                                    | 450 |
| C-mAb | 421 | WQQGNVFSCSVMHEALHNHYTQKSLSLSPG                                    | 450 |

**B)**

Identities:206/209(99%), Positives:207/209(99%), Gaps:0/209(0%)

|        |     |                                                                       |     |
|--------|-----|-----------------------------------------------------------------------|-----|
| H-mAb  | 240 | GGPSVFLFPPKPKDTLMISRTPEVTCVVDVSHEDPEVKFNWYVDGVEVHNAKTKPREEQ           | 299 |
| Fc-YTE | 236 | GGPSVFLFPPKPKDTL <b>LYIT</b> REPEVTCVVDVSHEDPEVKFNWYVDGVEVHNAKTKPREEQ | 295 |
| H-mAb  | 300 | YNSTYRVSVLTIVLHQLDNLNGKEYKCKVSNKALPAPIEKTISKAKGQPREPQVYTLPPSR         | 359 |
| Fc-YTE | 296 | YNSTYRVSVLTIVLHQLDNLNGKEYKCKVSNKALPAPIEKTISKAKGQPREPQVYTLPPSR         | 355 |
| H-mAb  | 360 | DELTKNQVSLTCLVKGFYPSDIAVEWESNGQPENNYKTPPVLDSDGSFFLYSKLTVDKS           | 419 |
| Fc-YTE | 356 | DELTKNQVSLTCLVKGFYPSDIAVEWESNGQPENNYKTPPVLDSDGSFFLYSKLTVDKS           | 415 |
| H-mAb  | 420 | RWQQGNVFSCSVMHEALHNHYTQKSLSLS                                         | 447 |
| Fc-YTE | 416 | RWQQGNVFSCSVMHEALHNHYTQKSLSLS                                         | 444 |

**Supporting Figure S1. Alignment of HCs of H-mAb with C-mAb (A) and HC of H-mAb with Fc-YTE (B).** Residues marked in bold are directly implicated in the binding of Fc-YTE to FcRn according to the crystal structure solved by Oganessian et al.<sup>2</sup> The alignment was performed by the BLAST algorithm.<sup>3,4</sup>

Identities:87/215(40%), Positives:123/215(57%), Gaps:11/215(5%)

|       |     |                                                              |     |
|-------|-----|--------------------------------------------------------------|-----|
| H-mAb | 1   | DIQMTQSPSSLSASVGDRVTITCRASQG---IRNYLAWYQQKPGKAPKLLIYAAS      | 57  |
|       |     | S+L+ S G+ VT+TCR+S G       NY W Q+KP       LI + G            |     |
| C-mAb | 1   | -QAVVTQESALTTSPGETVTLTCRSSTGAVTTSNYANWVQEKPDLFTGLIGGTNNRAPG  | 59  |
| H-mAb | 58  | VPSRFGSGSGTDFTLTISLQPEDVATYYCQRYNRAPYTFGQGTKVEI-KRTVAAPSVF   | 116 |
|       |     | VP+RFSGS G    LTI+ Q ED A Y+C +    + FG GTK+ + + ++PSV       |     |
| C-mAb | 60  | VPARFSGSLIGDKAALTITGTQTEDEAMYFCALWYSNHWVFGGGTKLTVLGQPKSSPSVT | 119 |
| H-mAb | 117 | IFPPSDEQLKSGTASVVCLLNNFYPREAKVQWKVDNALQSGNSQESVTEQDSKDST--YS | 174 |
|       |     | +FPPS E+L++ A++VC + +FYP    V WKVD    + +Q T Q SK S Y        |     |
| C-mAb | 120 | LFPPSSEELETNKATLVCTITDFYPGVVTVDWKVDG---TPVTQGMETTQPSKQSNNKYM | 176 |
| H-mAb | 175 | LSSTLTLSKADYEKHKVYACEVTHQGLSSPVTKSFNRGEC                     | 214 |
|       |     | SS LTL+    +E+H Y+C+VTH+G + V KS +R +C                       |     |
| C-mAb | 177 | ASSYLTLTARAWERHSSYSQVTHEGHT--VEKSLSRADC                      | 215 |

**Supporting Figure S2. Alignment of LCs of H-mAb and C-mAb.** The alignment was performed by the BLAST algorithm.<sup>3,4</sup>

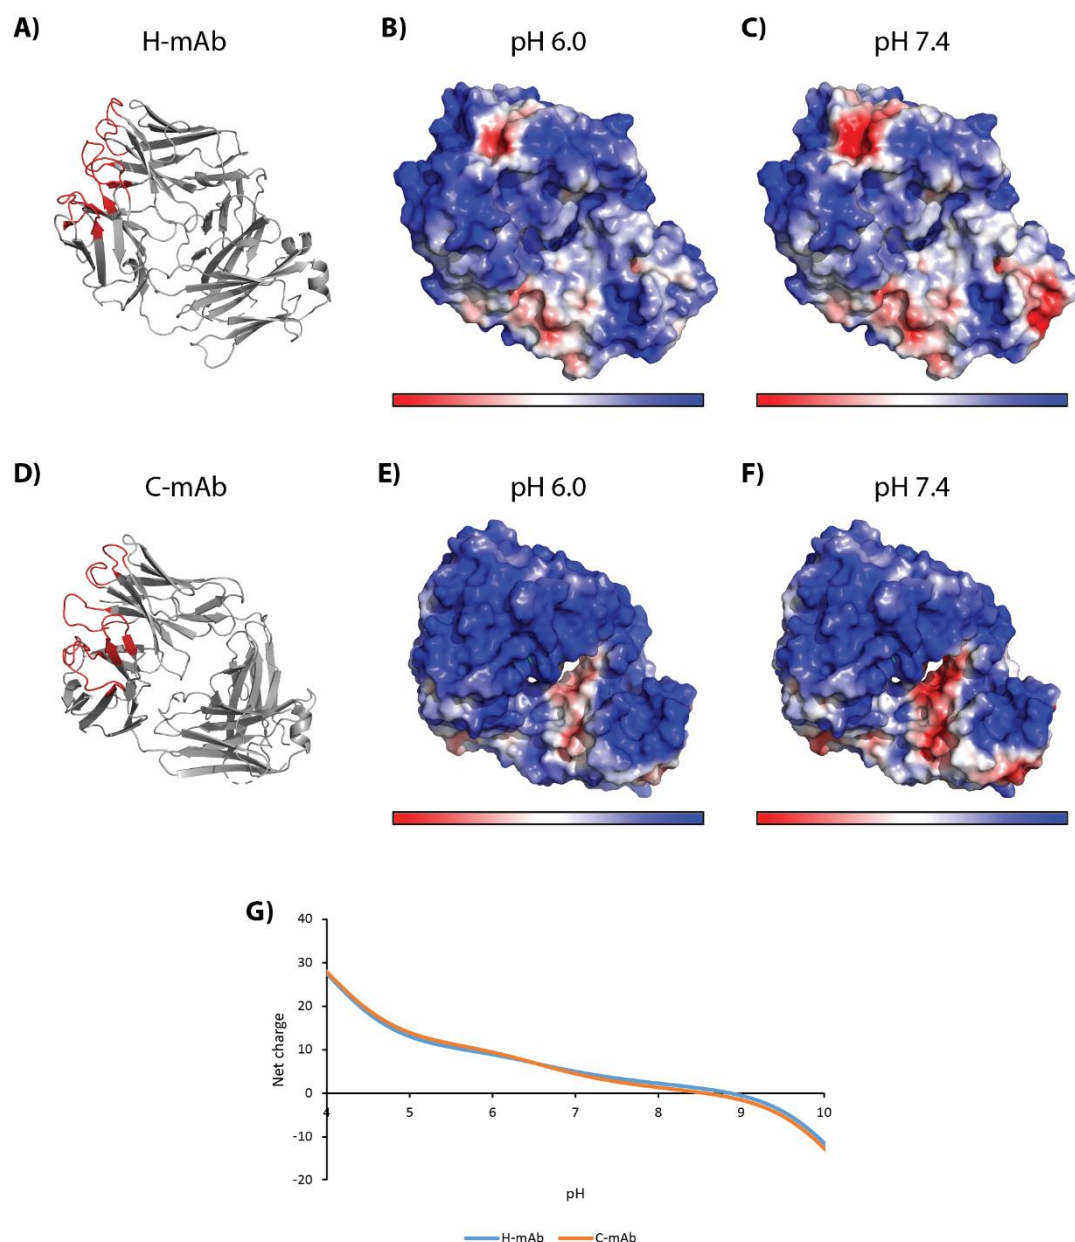

**Supporting Figure S3. Charge distribution and pH-dependent net charge of the Fab domains of H-mAb and C-mAb.** Crystal structure of the Fab domains of H-mAb (A) and C-mAb (D) (PDB ID:4NYL and 1NGP). CDRs are highlighted in red. B-C) Isoelectrical surface maps of H-mAb at pH 6.0 and pH 7.4 contoured at  $\pm 3k_B T/e$ , red; negative and blue: positive. E-F) Isoelectrical surface maps of C-mAb at pH 6.0 and pH 7.4 contoured at  $\pm 3k_B T/e$ , red; negative and blue: positive. G) pH-dependent sequence based net charge of the Fab domains of H-mAb (*blue* line) and C-mAb (*orange* line). See supplemental methods for further details.

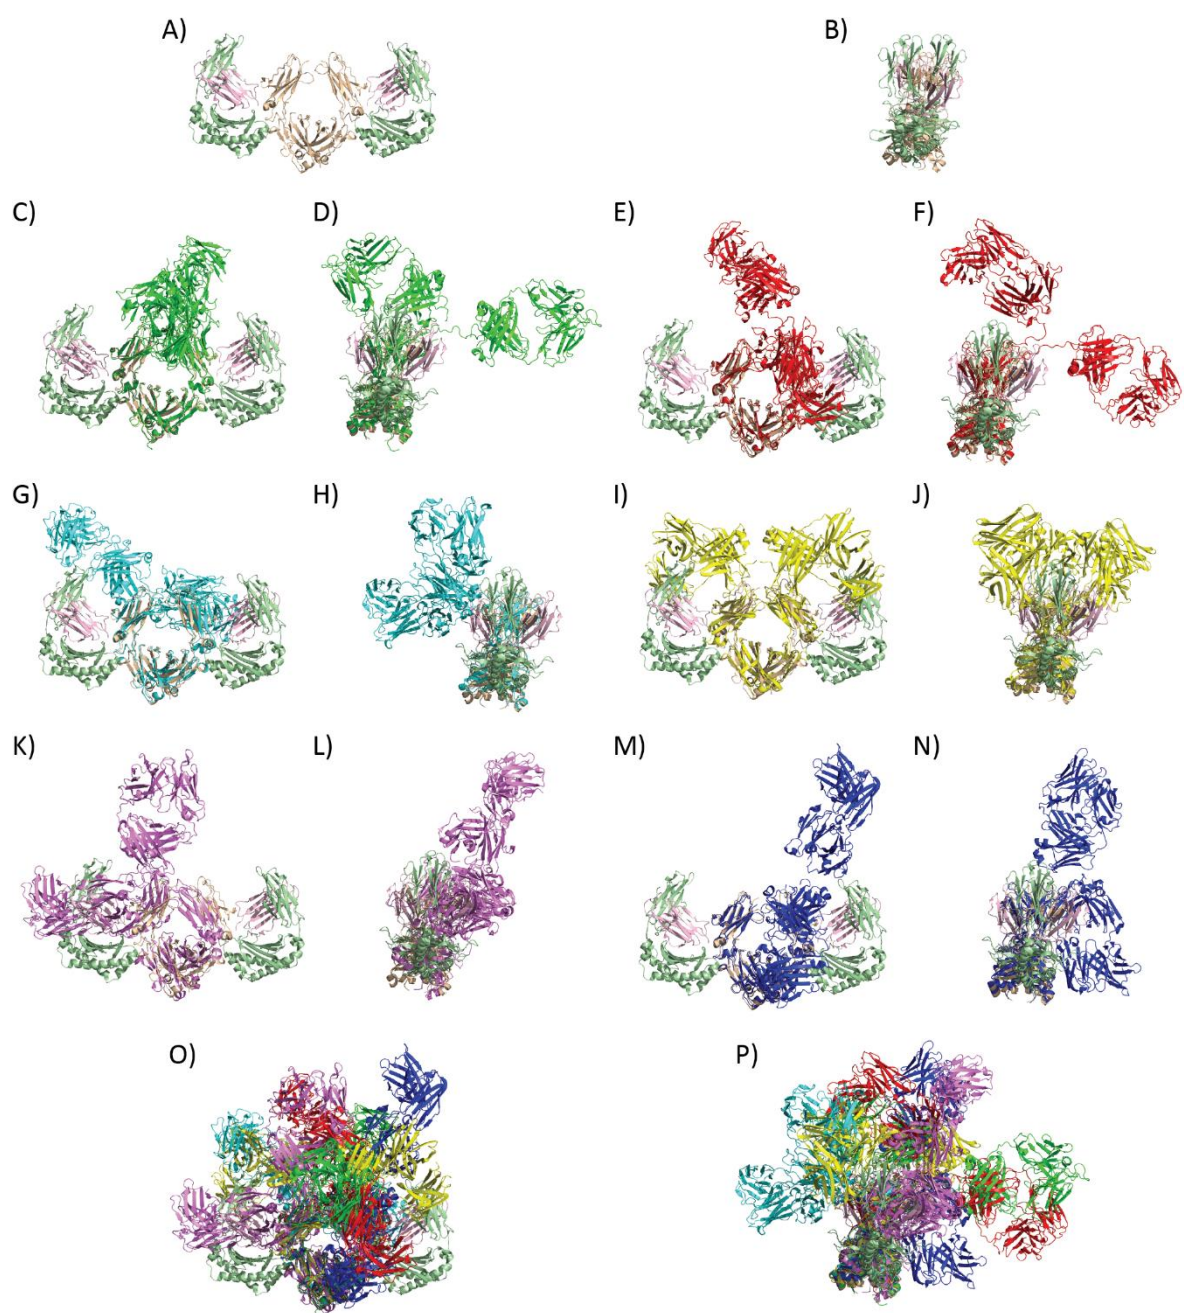

**Supporting Figure S4: Conformational flexibility of full-length IgGs.** Six crystal structures of full-length IgGs (PDB ID: 1IGT, 1HZH, 6GFE, 1MCO, 5FK3, and 1IGY) were aligned with the Fc part of the crystal structure of Fc-YTE in complex with FcRn (PDB ID: 4N0U, human serum albumin was omitted to simplify the figure). A-B) FcRn in complex with Fc-YTE (PDB ID: 4N0U) C-N) Individual IgGs shown with FcRn in complex with Fc-YTE. O-P) All IgG structures are shown at the same time. *Red*: 1IGT, *green*: 1HZH, *blue*: 6GFE, *yellow*: 1MCO, *violet*: 5DK3, *cyan*: 1IGY, *pale green*: FcRn, *light pink*:  $\beta$ -2-microglobulin, *wheat*: Fc-YTE. All figures are presented in two different views: a front view (A, C, E, G, I, K, M and O) and a view where the front view is rotated 90° counter clockwise along the horizontal axis (B, D, F, H, J, L, N and P).



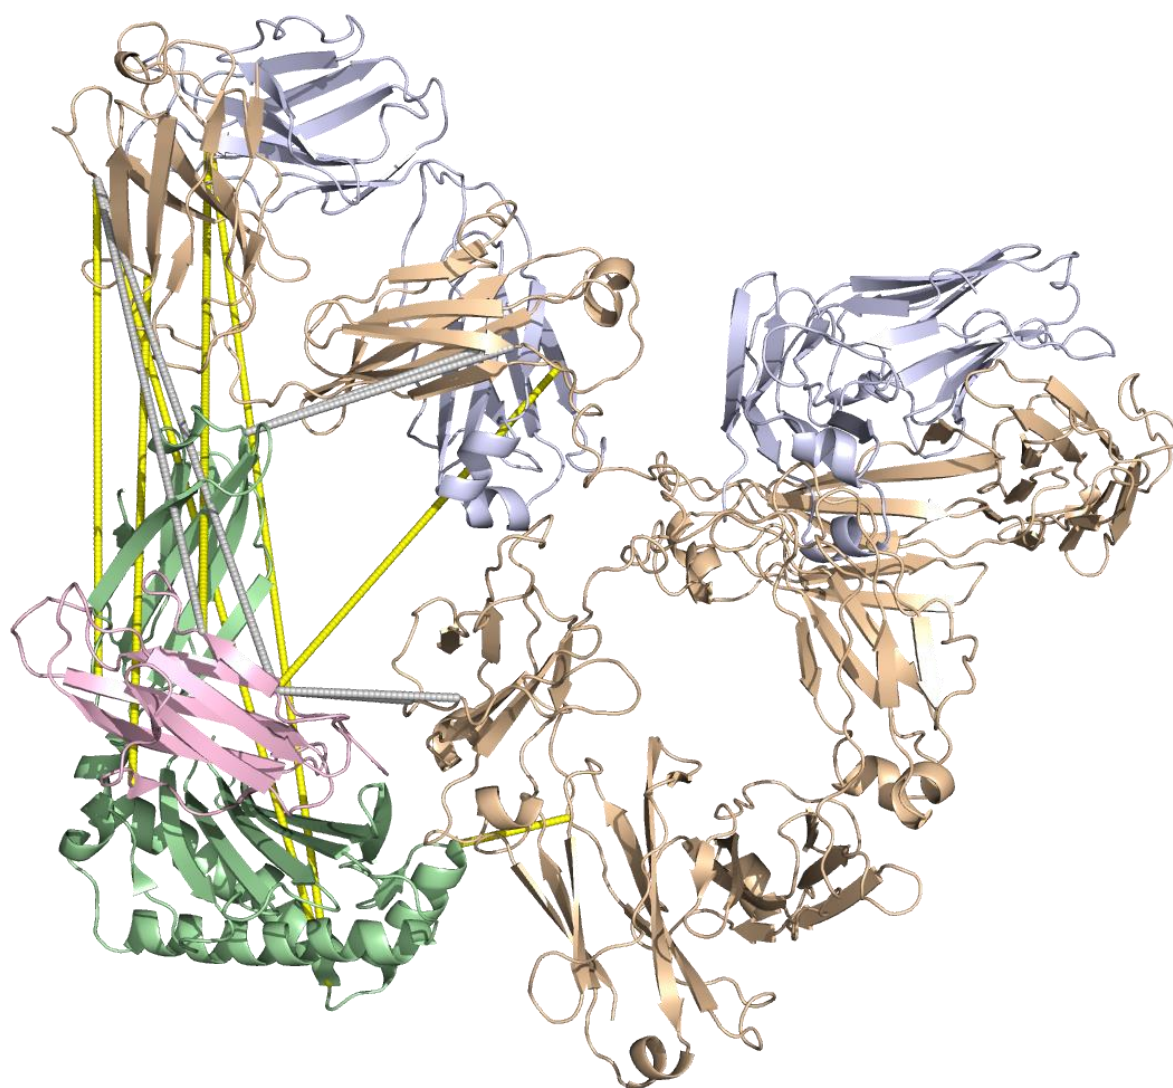

**Supporting Figure S5: Visualization of cross-links identified in the complex between mutC-mAb and FcRn.** Cross-links also found in the complex of C-mAb and FcRn are colored gray, while the cross-links only identified in the mutC-mAb:FcRn complex are colored yellow. The cross-links between mutC-mAb and FcRn illustrates several different binding modes not in line with the published crystal structure of FcRn:Fc-YTE complex (PDB ID: 4N0U). *Pale green*:  $\alpha$  domains of FcRn, *light pink*:  $\beta$ 2m, *wheat*: HC of mutC-mAb, *light blue*: LC of mutC-mAb.

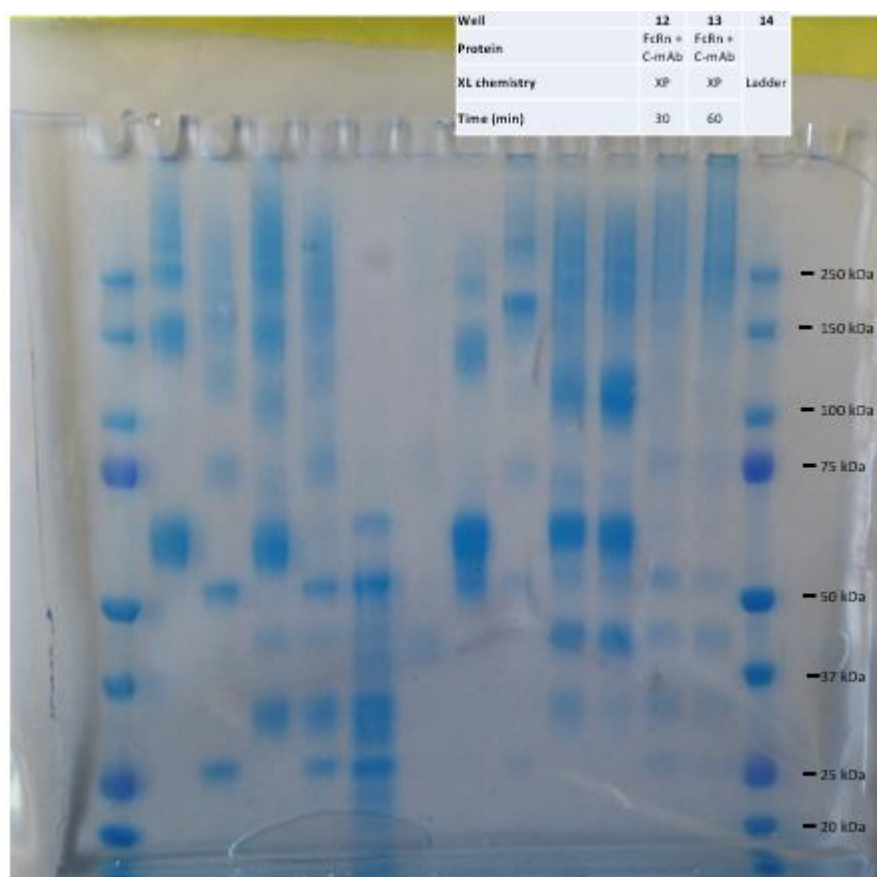

**Supporting Figure S6: Observation of higher order oligomers after cross-linking a solution of FcRn and C-mAb with XPlex cross-linking (XP).**

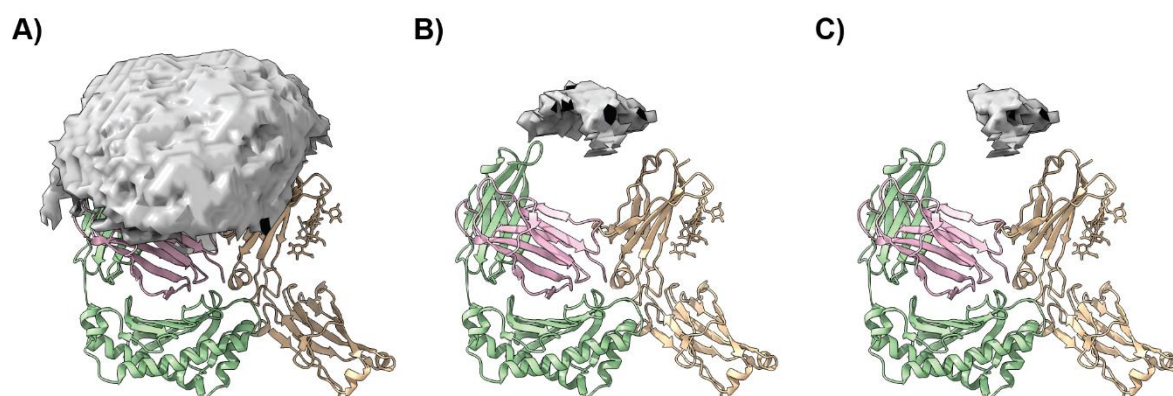

**Supporting Figure S7: DisVis analysis of mAbs Fab domain interaction with FcRn.** A) Interaction space of the Fab domain of H-mAb defined by the identified cross-links between H-mAb Fab domains and FcRn. B) Interaction space of the C-mAb Fab domain defined by the identified cross-links between C-mAb Fab domains and FcRn. C) Interaction space of a generic Fab domain defined by combining all cross-links between the Fab domains of both C-mAb and H-mAb and FcRn. *Pale green*:  $\alpha$  domains of FcRn, *light pink*:  $\beta$ 2m, *wheat*: Fc-YTE.



### H-mAb - HC

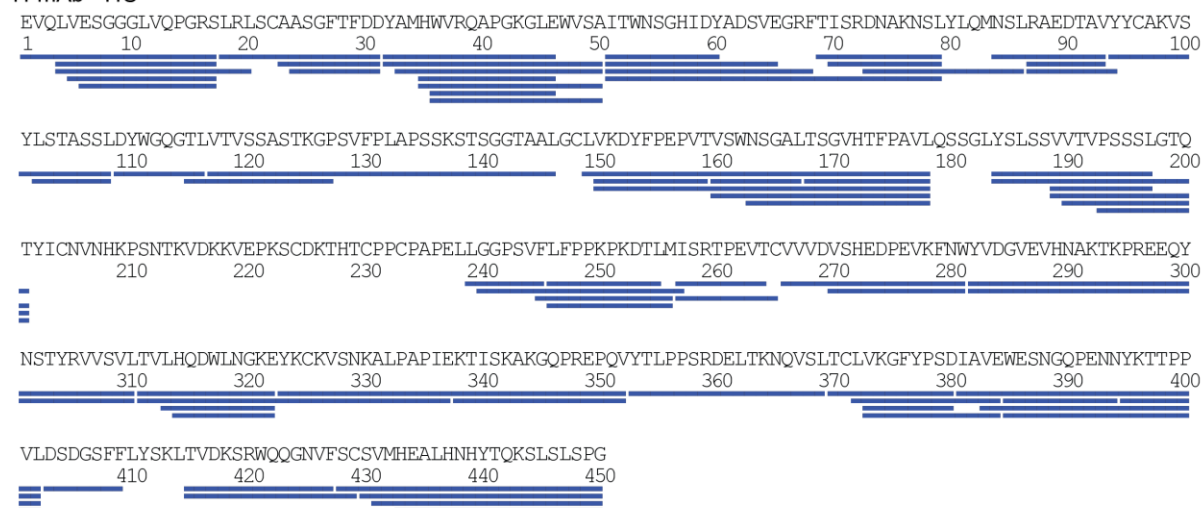

### H-mAb - LC

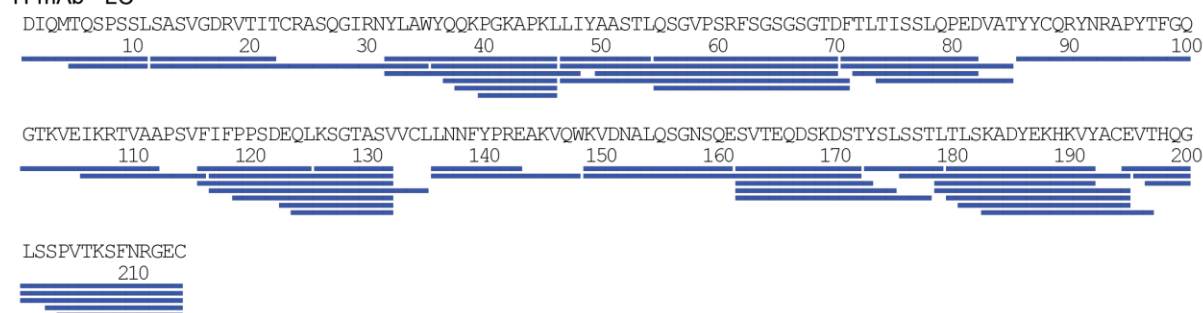

**Supporting Figure S8: Effective HDX-MS coverage map of H-mAb.** HDX data were obtained for 77 peptides covering 89.1% of the HC and for 51 peptides covering 100% of the LC.

### C-mAb - HC

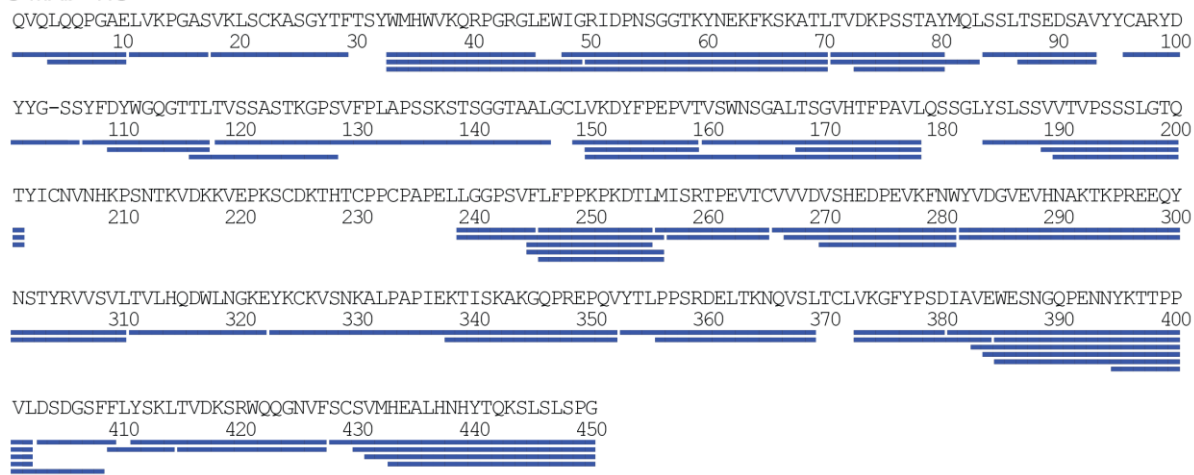

### C-mAb - LC

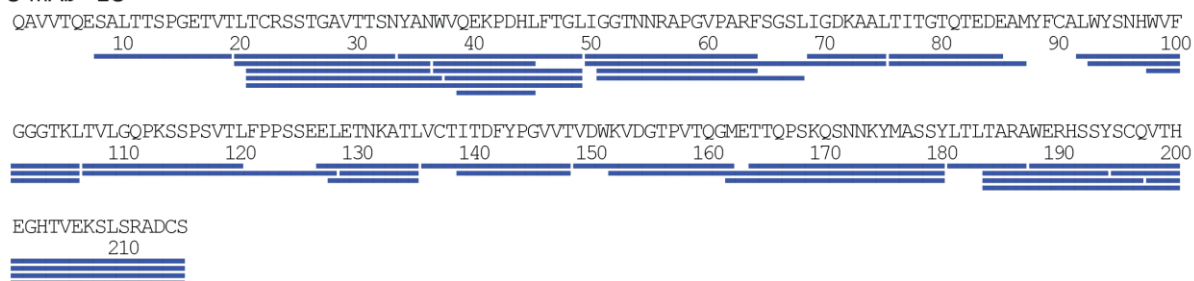

**Supporting Figure S9: Effective HDX-MS coverage map of C-mAb.** HDX data were obtained for 61 peptides covering 88.4% of the HC and for 39 peptides covering 94.9% of the LC.

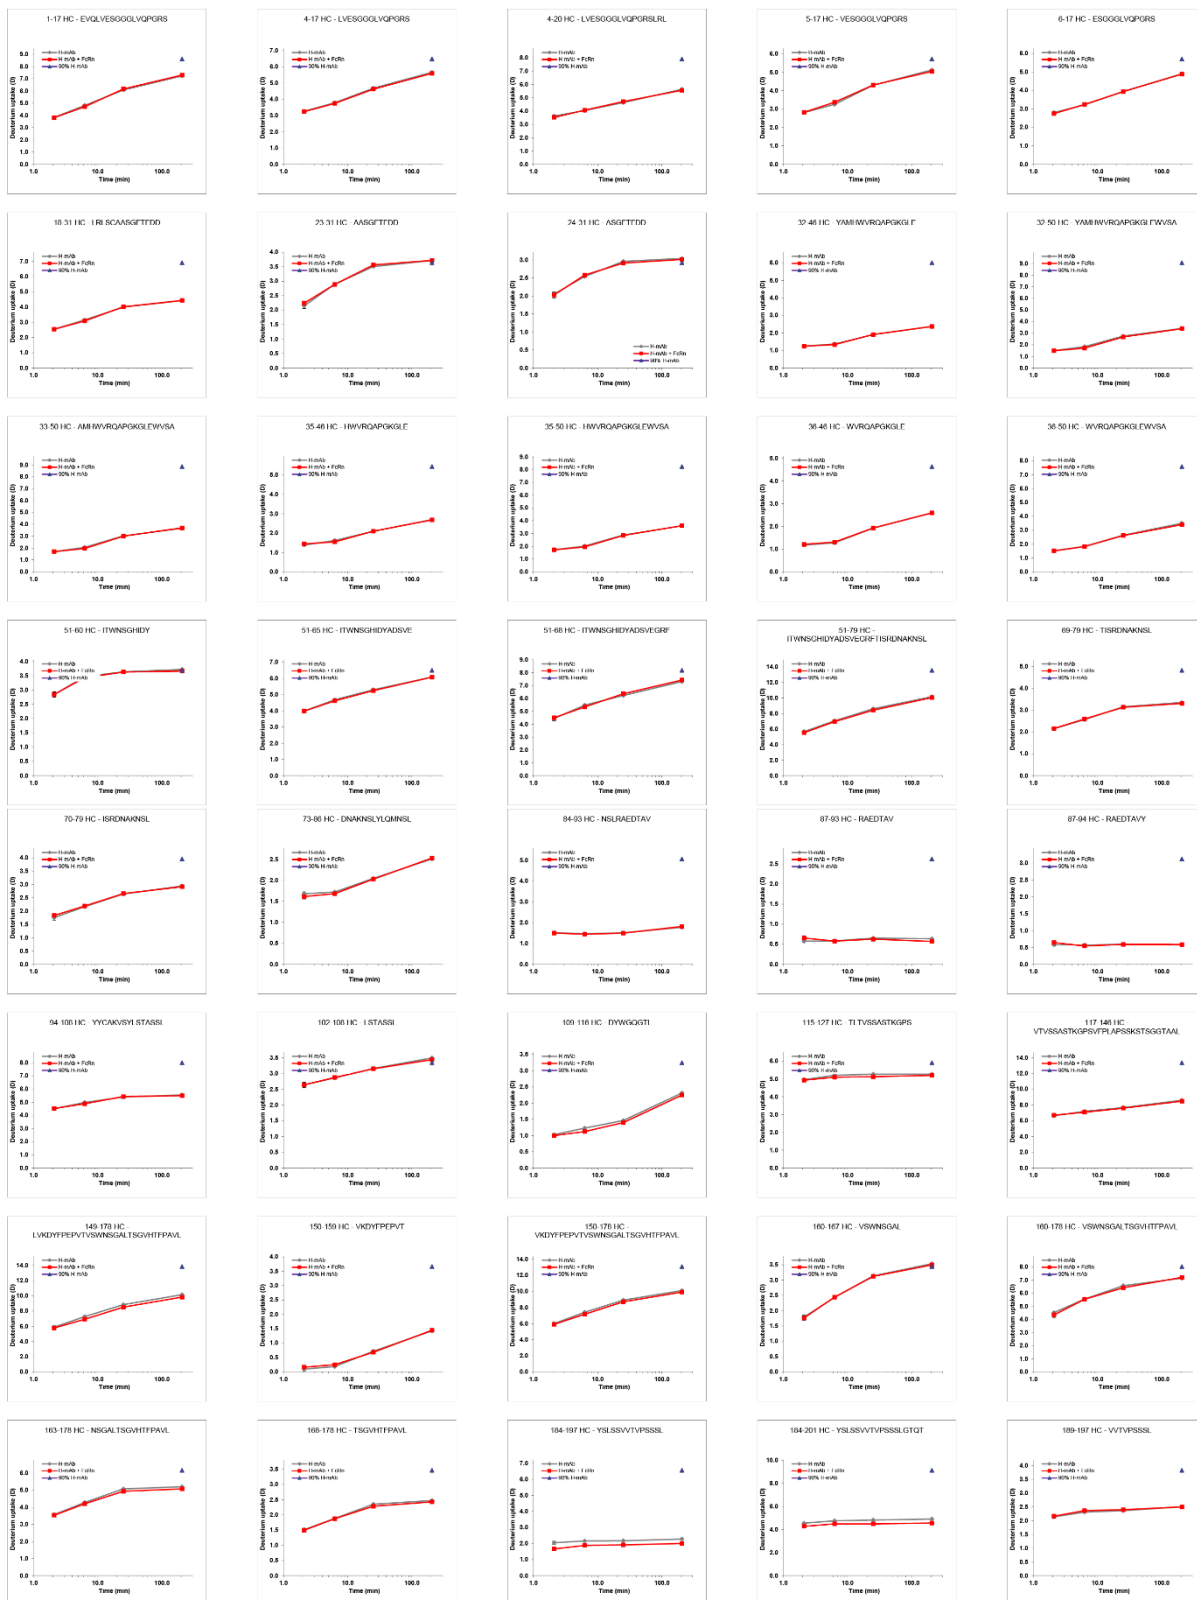

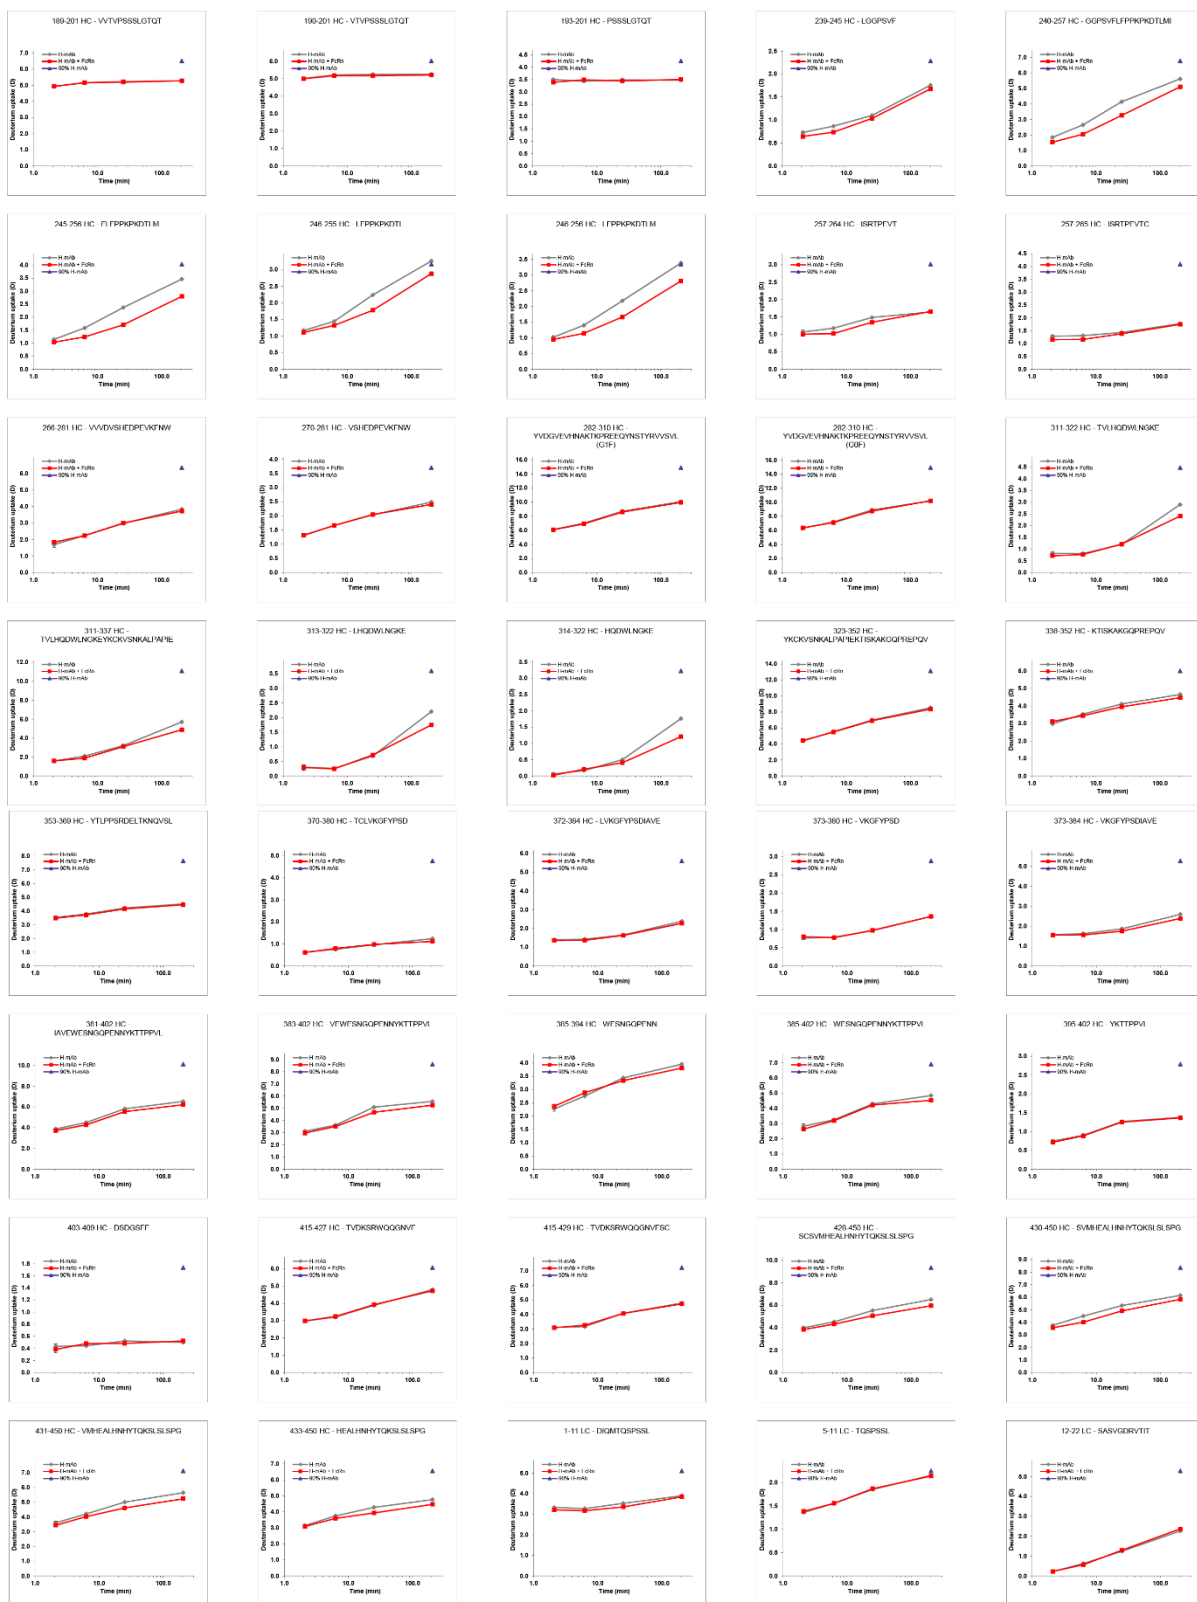

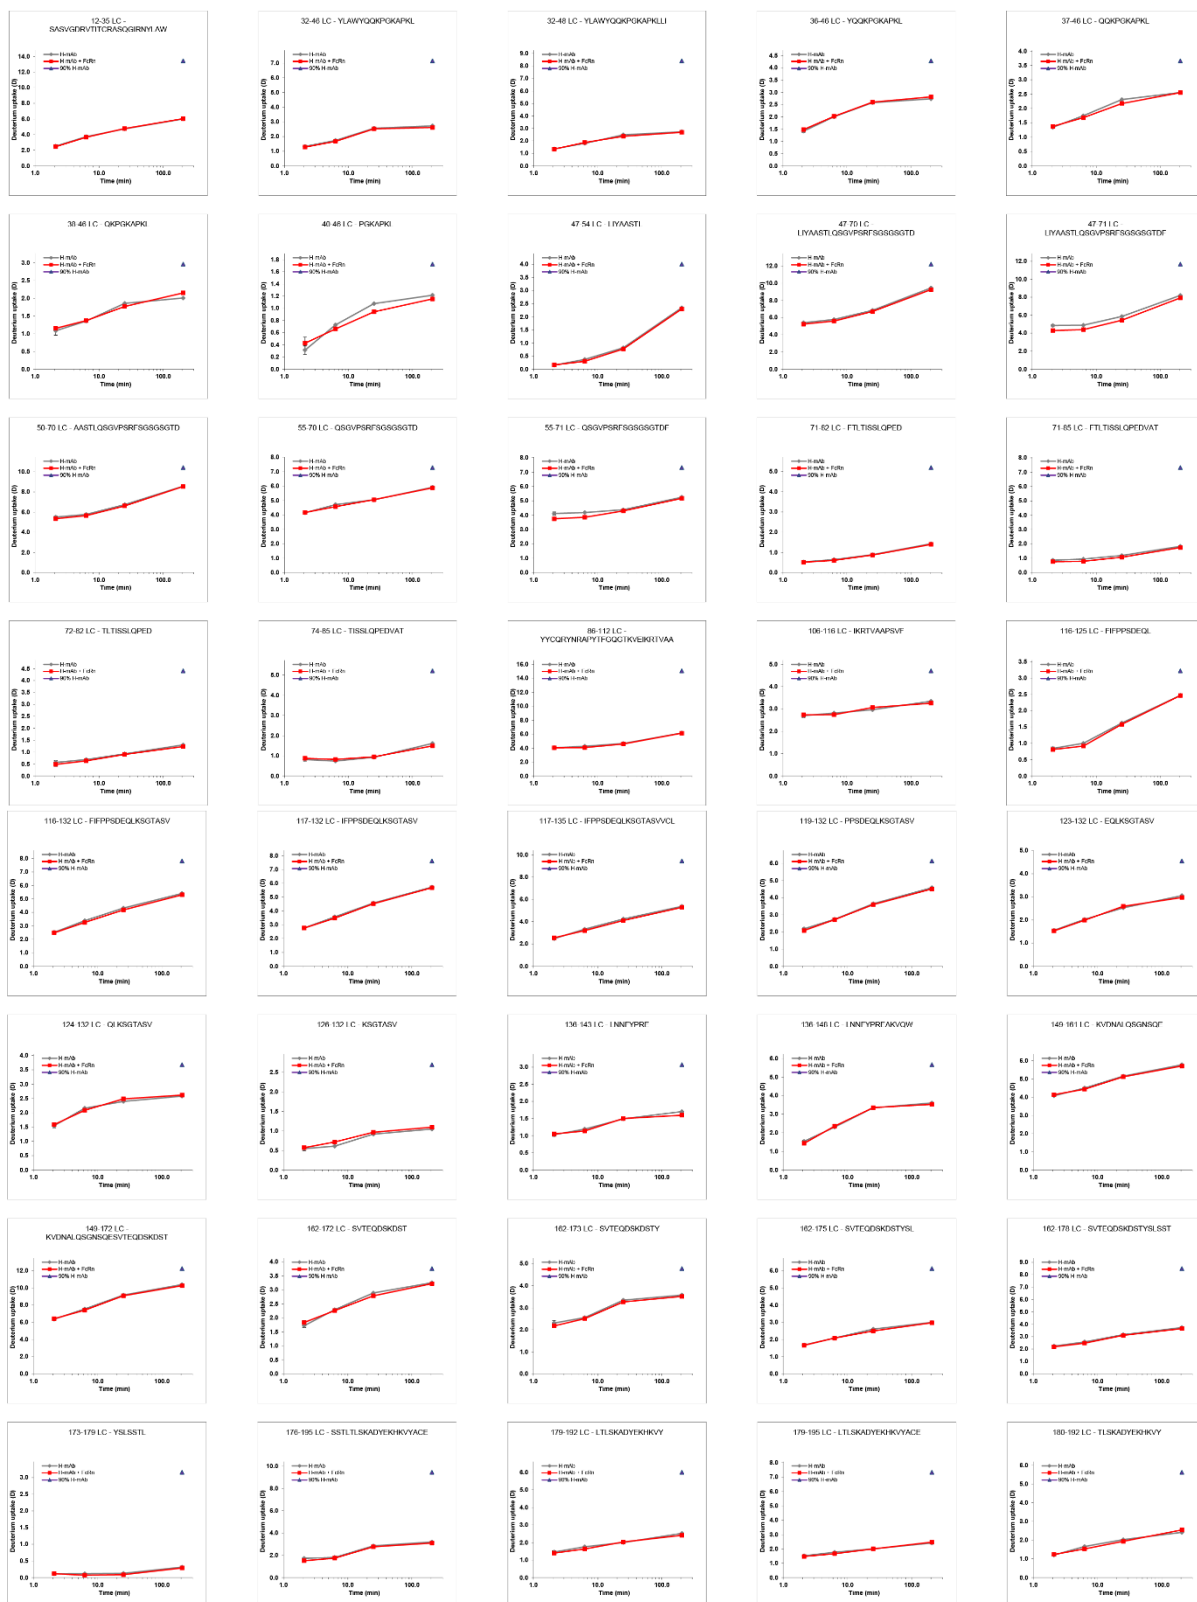

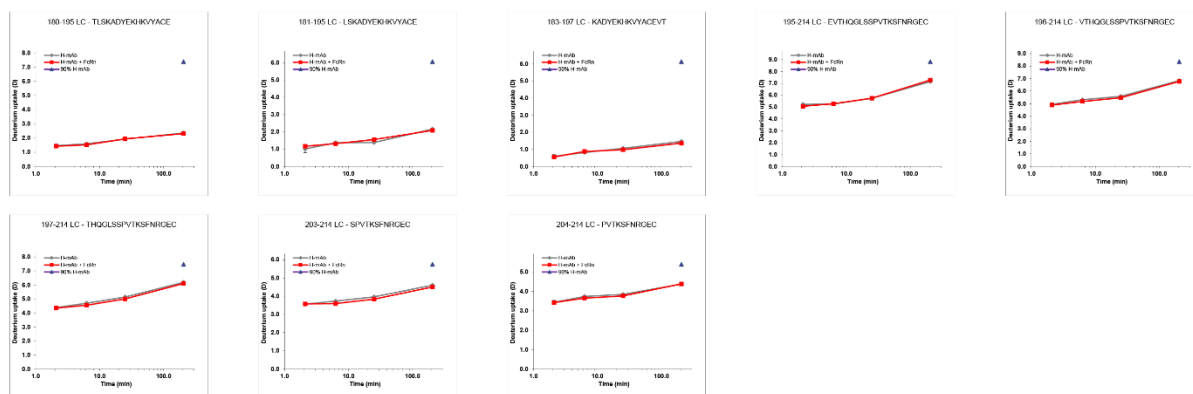

**Supporting Figure S10: HDX plots of H-mAb in the absence and presence of FcRn.** Absolute deuterium incorporation is plotted as a function of time for H-mAb (*grey* curves) and H-mAb in the presence of FcRn (*red* curves). Maximally labelled (90 %) control samples are plotted as *purple* triangles at the longest time points. SD is plotted as error bars (only slightly visible). ( $n = 1$  for all data points, except the first time point, where  $n=3$ ).

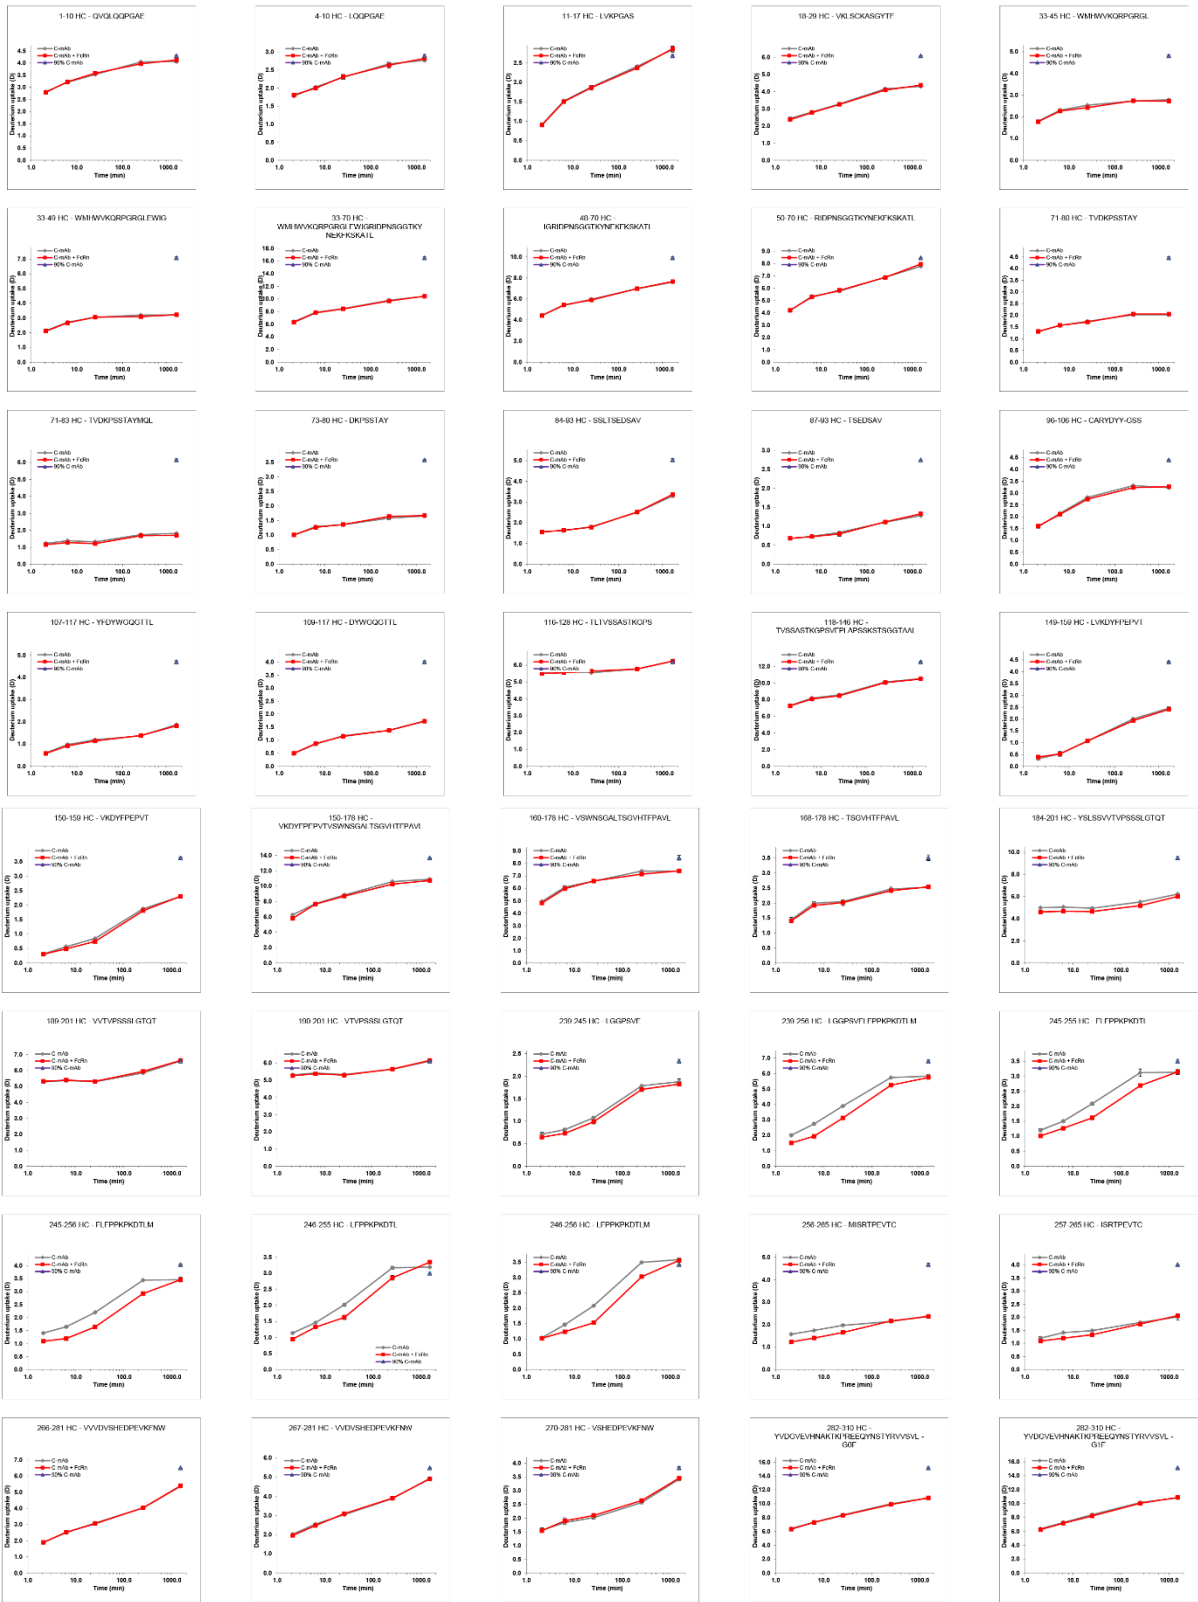

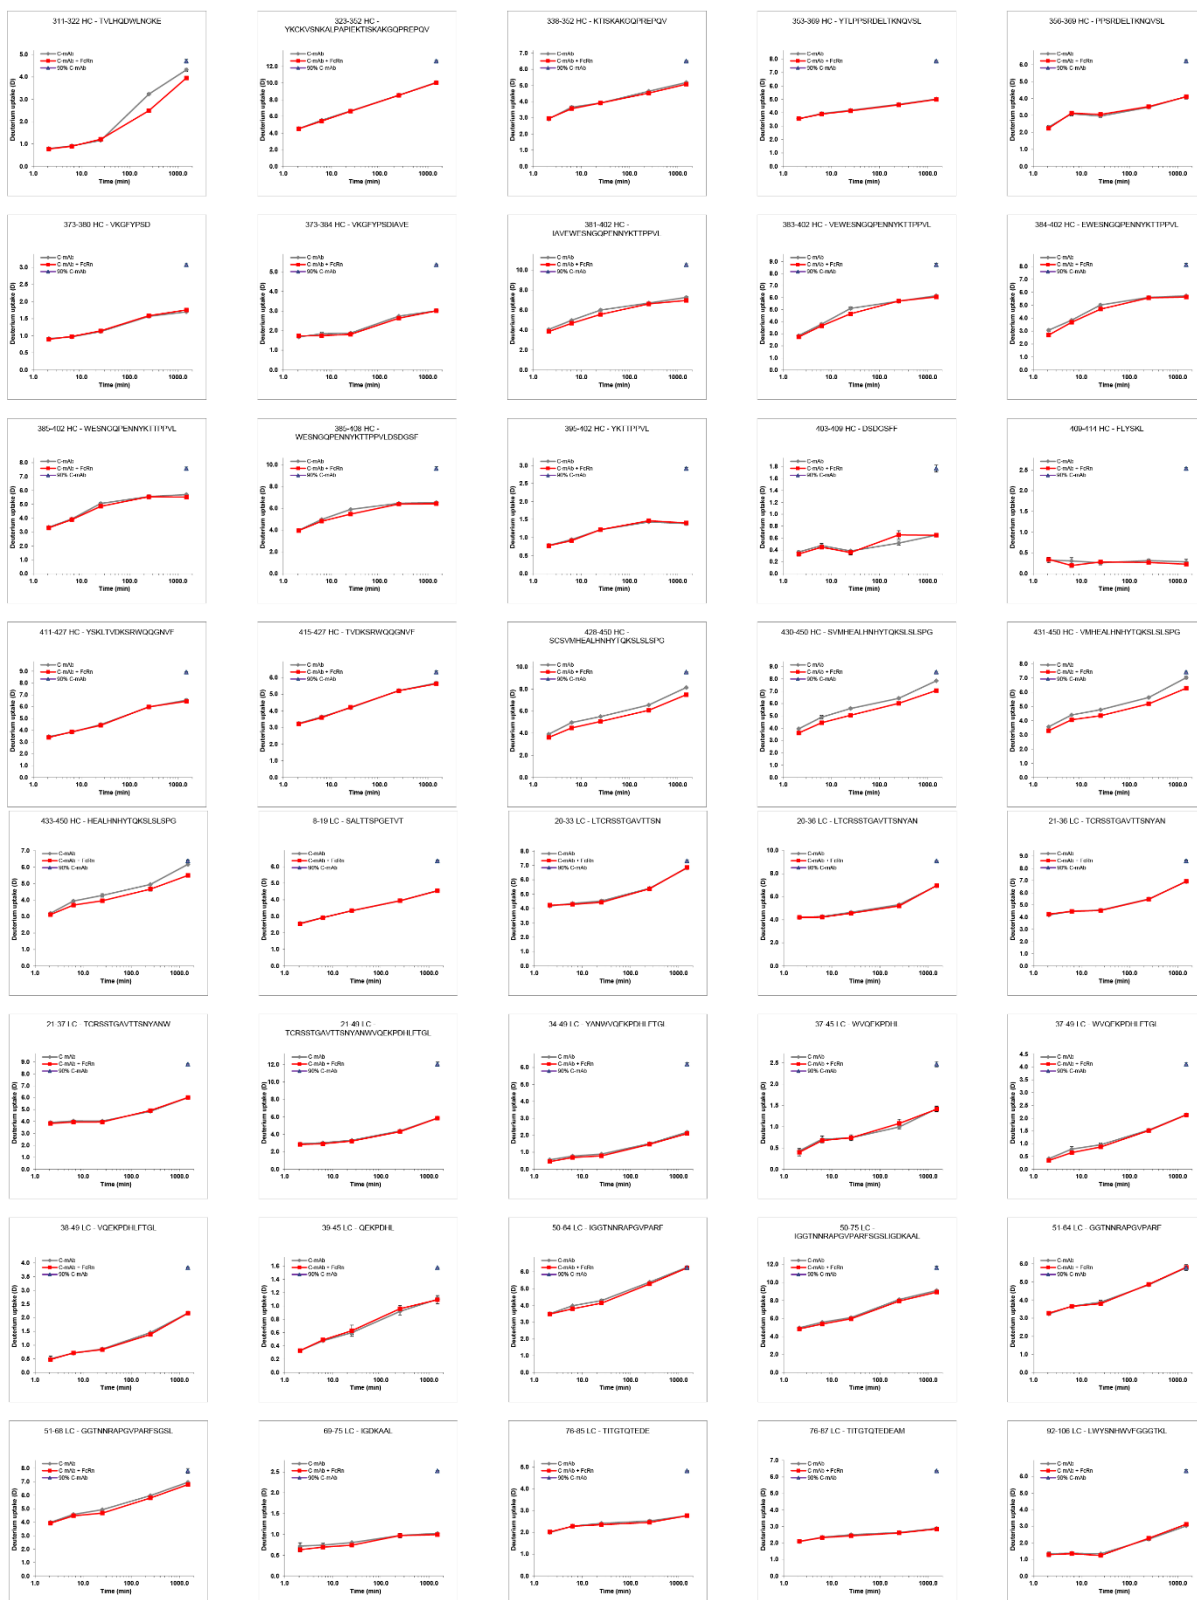



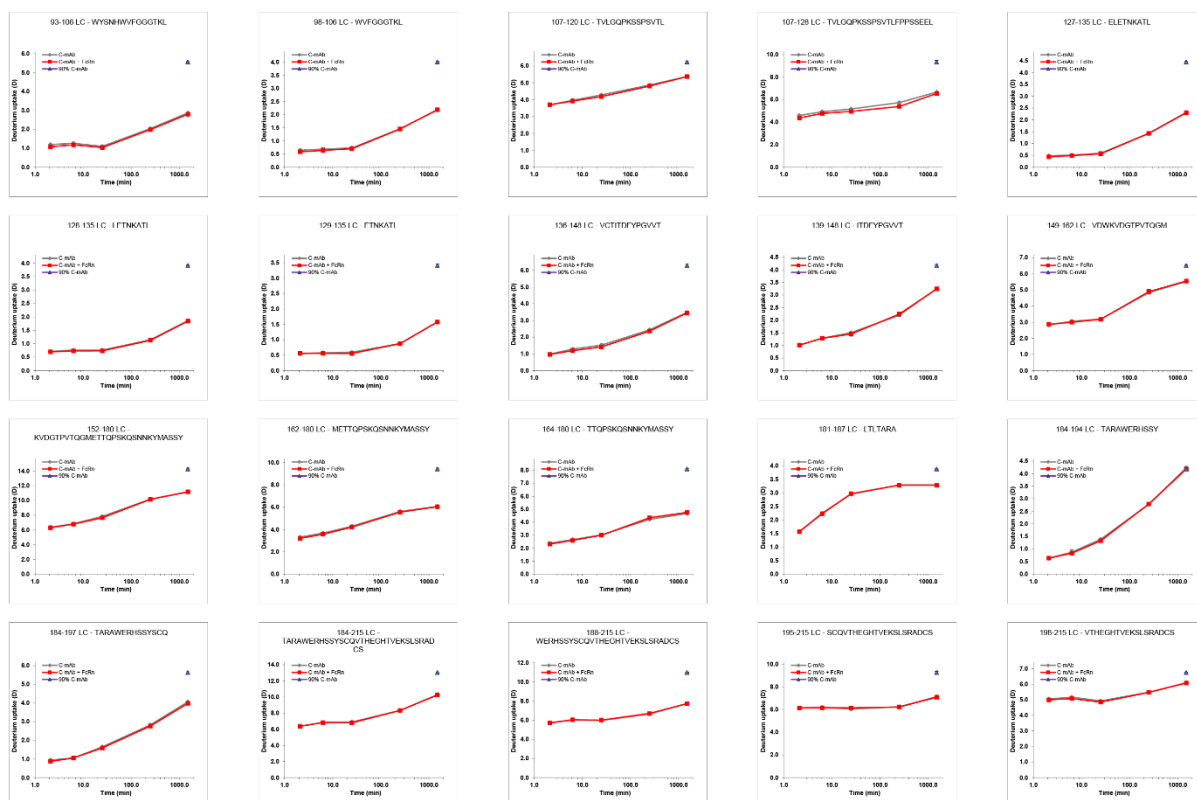

### Supporting Figure S11 HDX plots of C-mAb in the absence and presence of FcRn.

Absolute deuterium incorporation is plotted as a function of time for C-mAb (*grey curves*) and C-mAb in the presence of FcRn (*red curves*). Maximally labelled (90 %) control samples are plotted as *purple triangles* at the longest time points. SD is plotted as error bars (only slightly visible). (n=3).

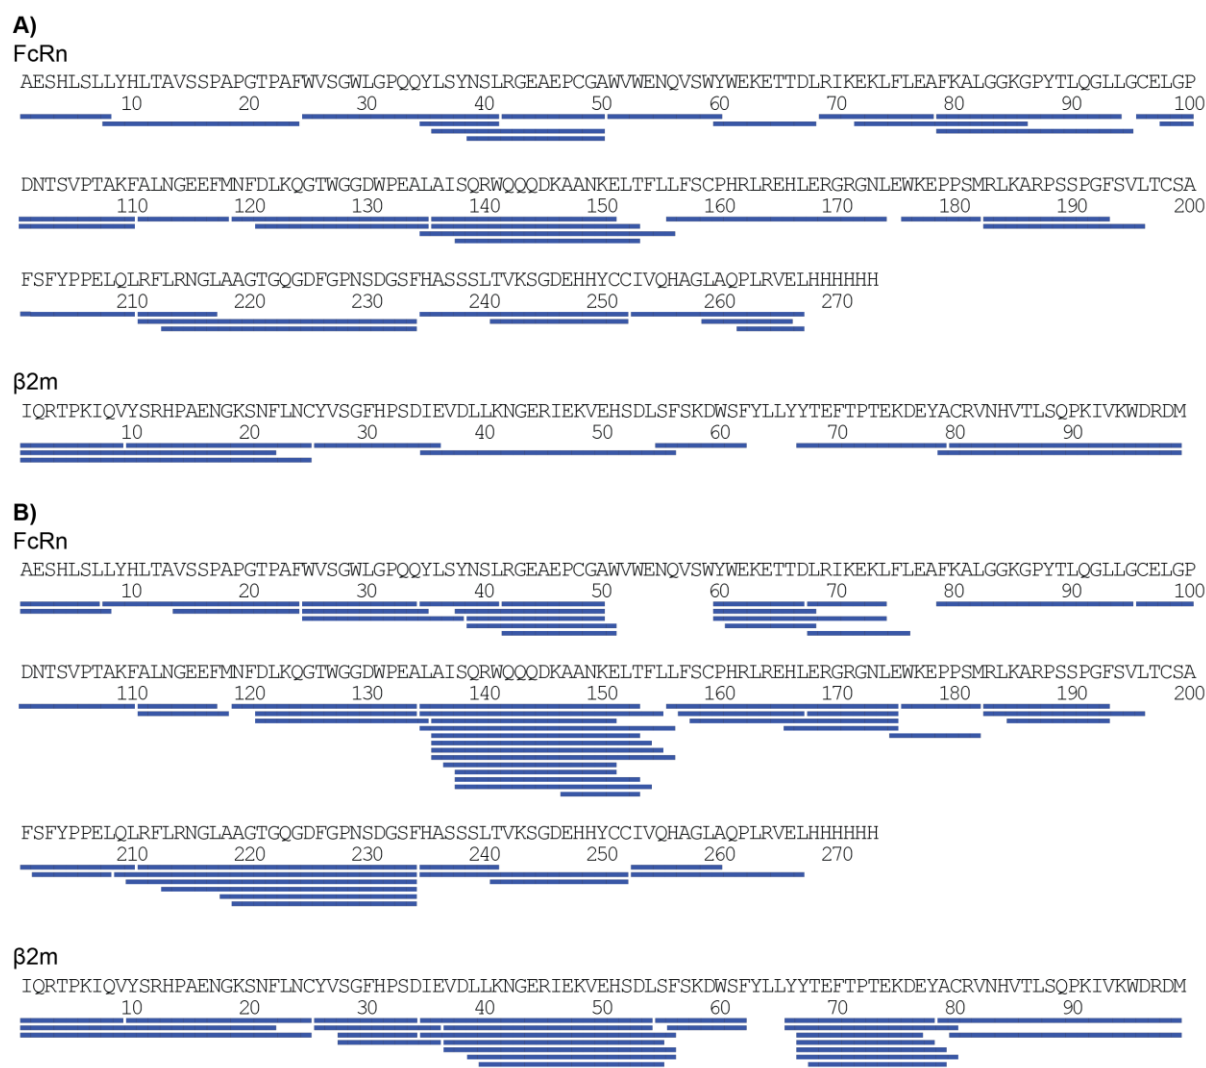

**Supporting Figure S12: Effective HDX-MS coverage map of FcRn.** Two separate data sets investigating two different exchange windows of FcRn in presence and absence of C-mAb and H-mAb were obtained. The first data set covered exchange times from 2.09 min to 1507.13 min (A), while the second data set covered exchange time from 13 s to 2.09 min (B). A) HDX data were obtained for 35 peptides covering 96.0% of the FcRn HC and for 10 peptides covering 96.0% of the β2m sequence. B) HDX data were obtained for 62 peptides covering 92.7% of the FcRn HC and for 28 peptides covering 97.0% of the β2m sequence.

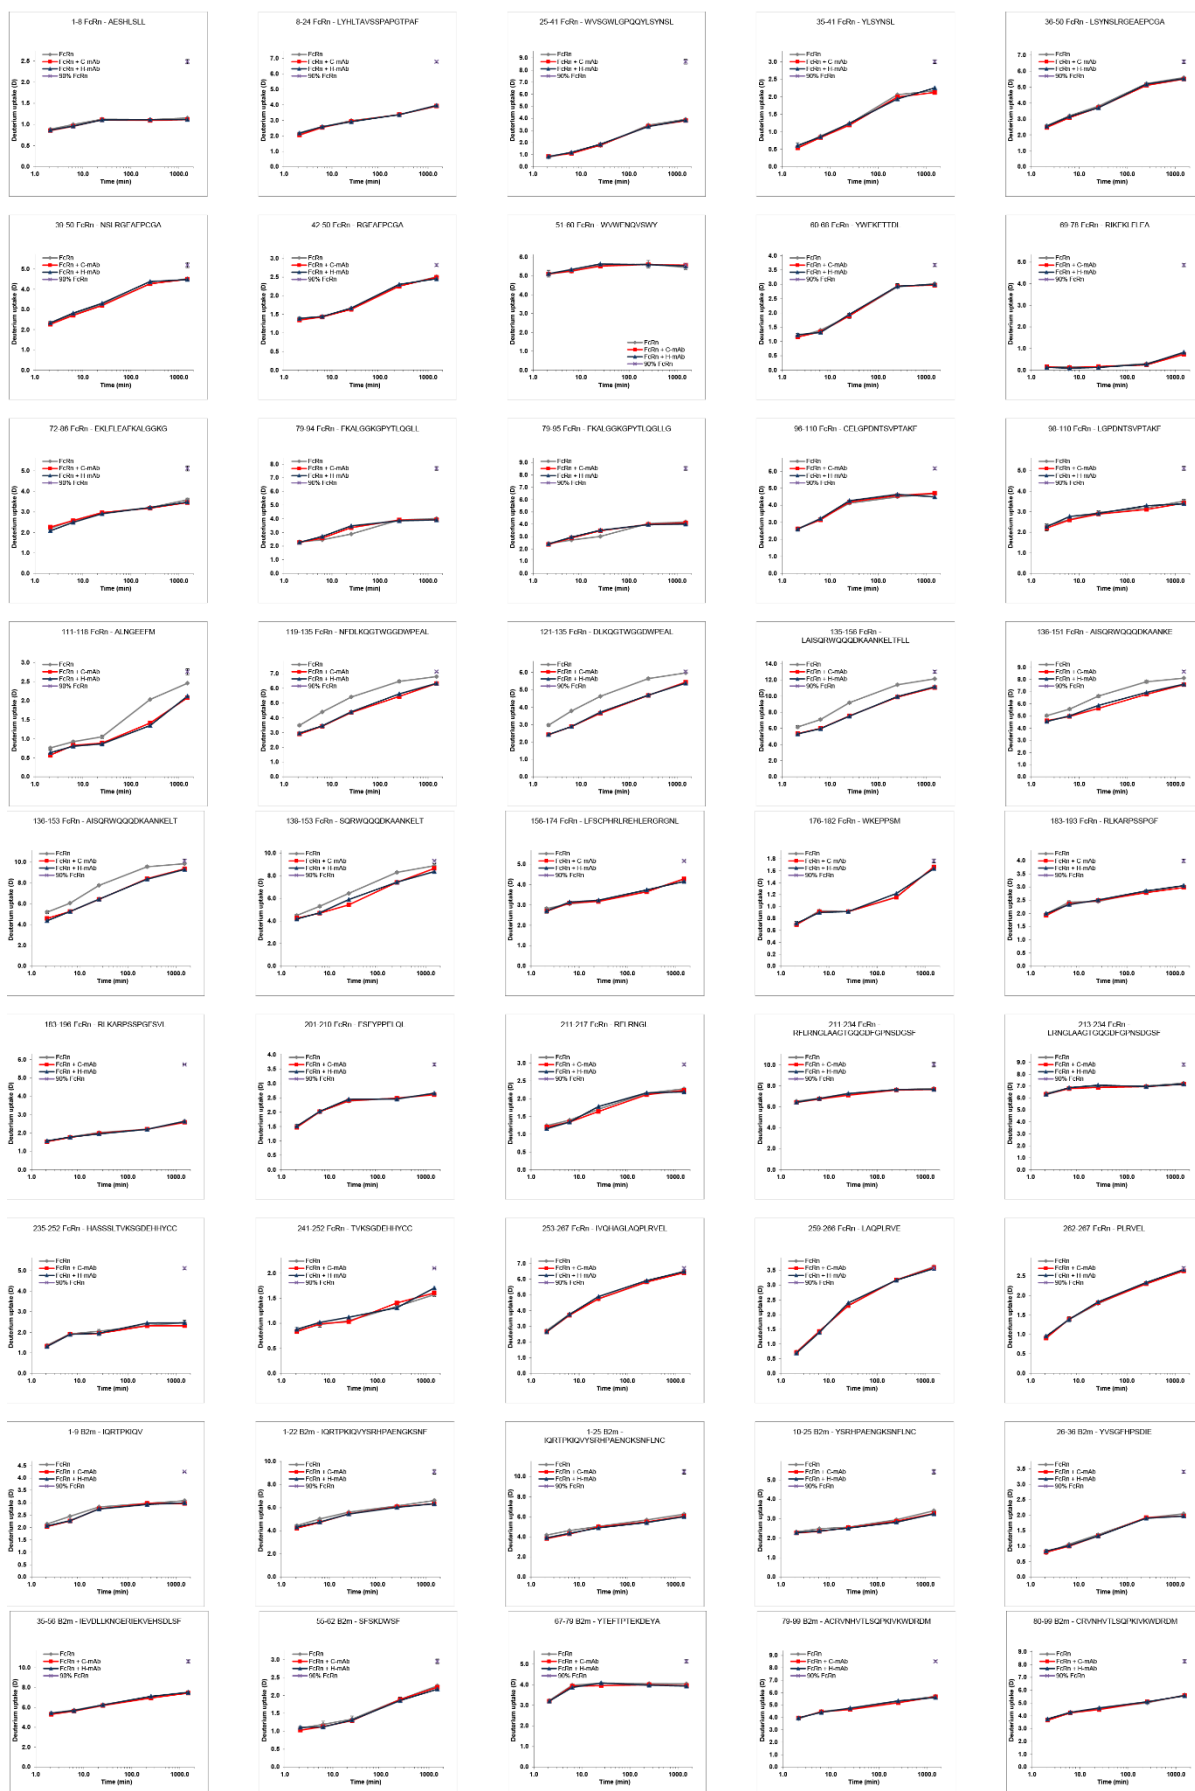

**Supporting Figure S13: HDX plots of FcRn in the absence and presence of either H-mAb or C-mAb (exchange time: 2.09 min to 1507.13 min).** Absolute deuterium incorporation is plotted as a function of time for FcRn (*grey* curves), FcRn in the presence of C-mAb (*red lines*) and FcRn in the presence of H-mAb (*blue* curves). Maximally labelled (90 %) control samples are plotted as *purple* crosses at the longest time points. SD is plotted as error bars (only slightly visible). (n = 3 for all data points, except the last four time points of FcRn in presence of H-mAb, where n=1).

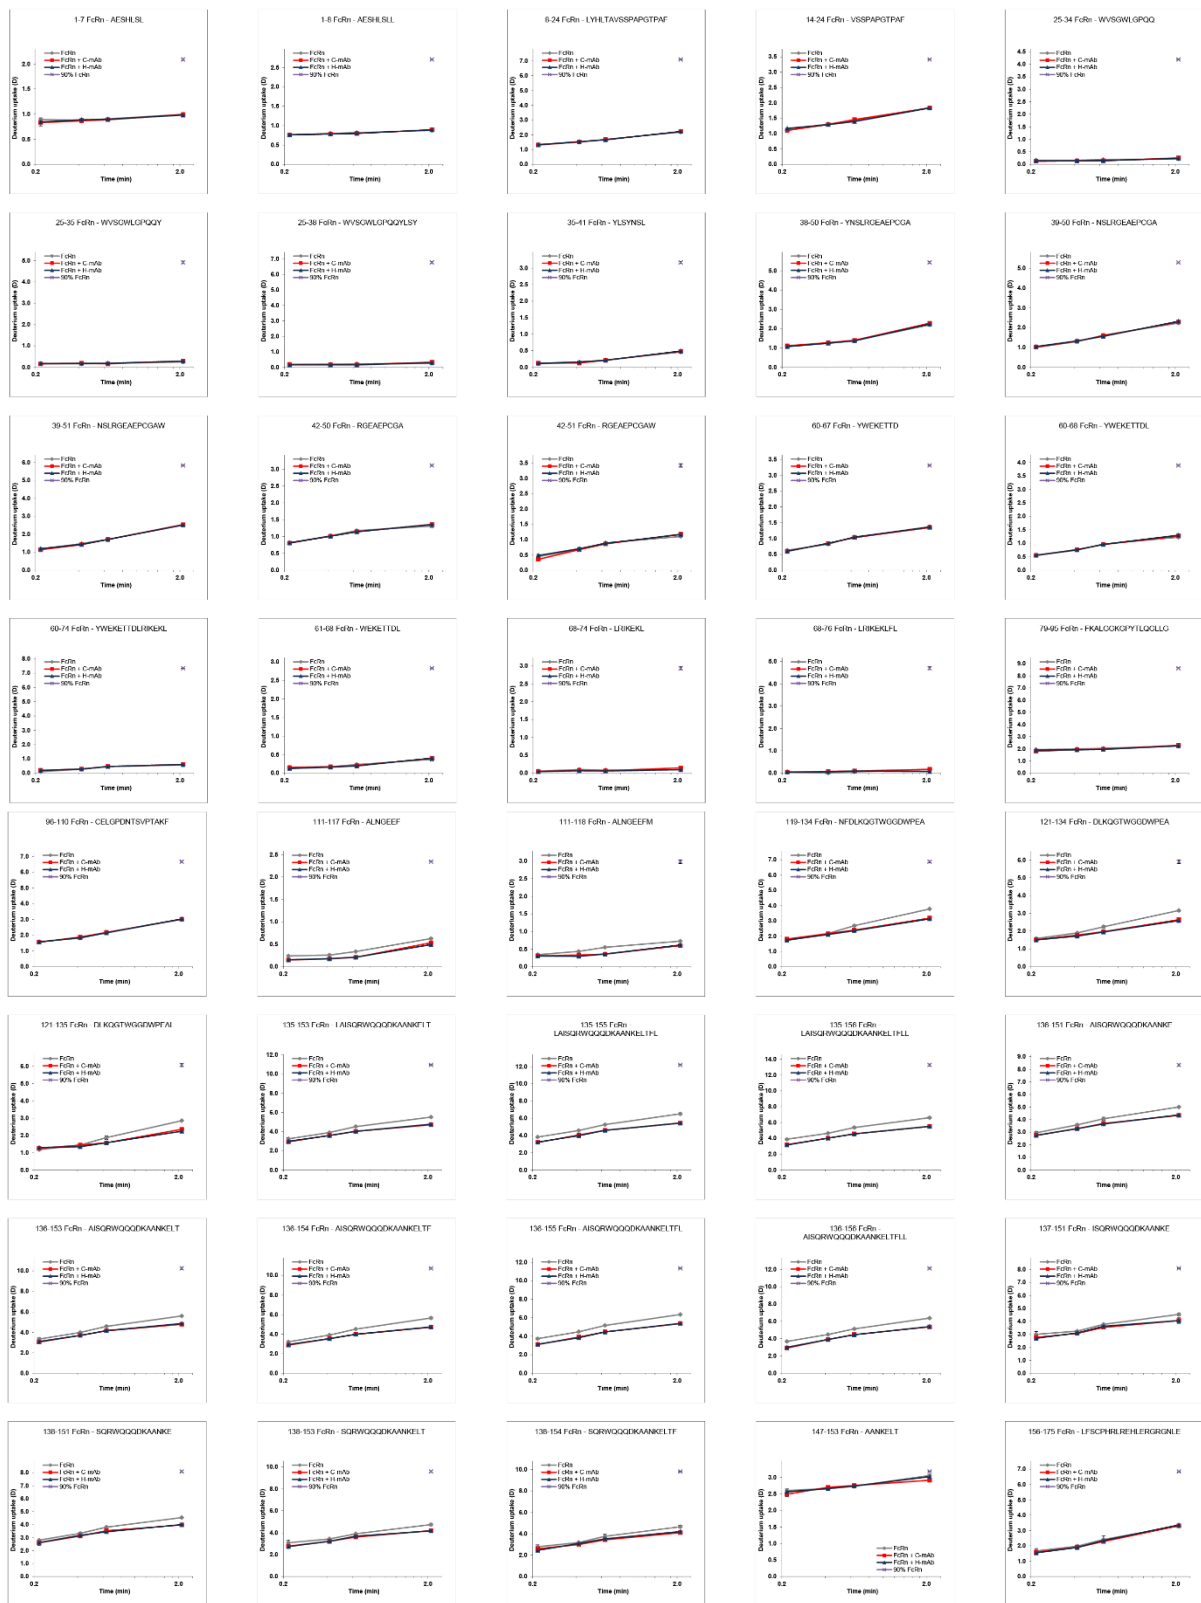

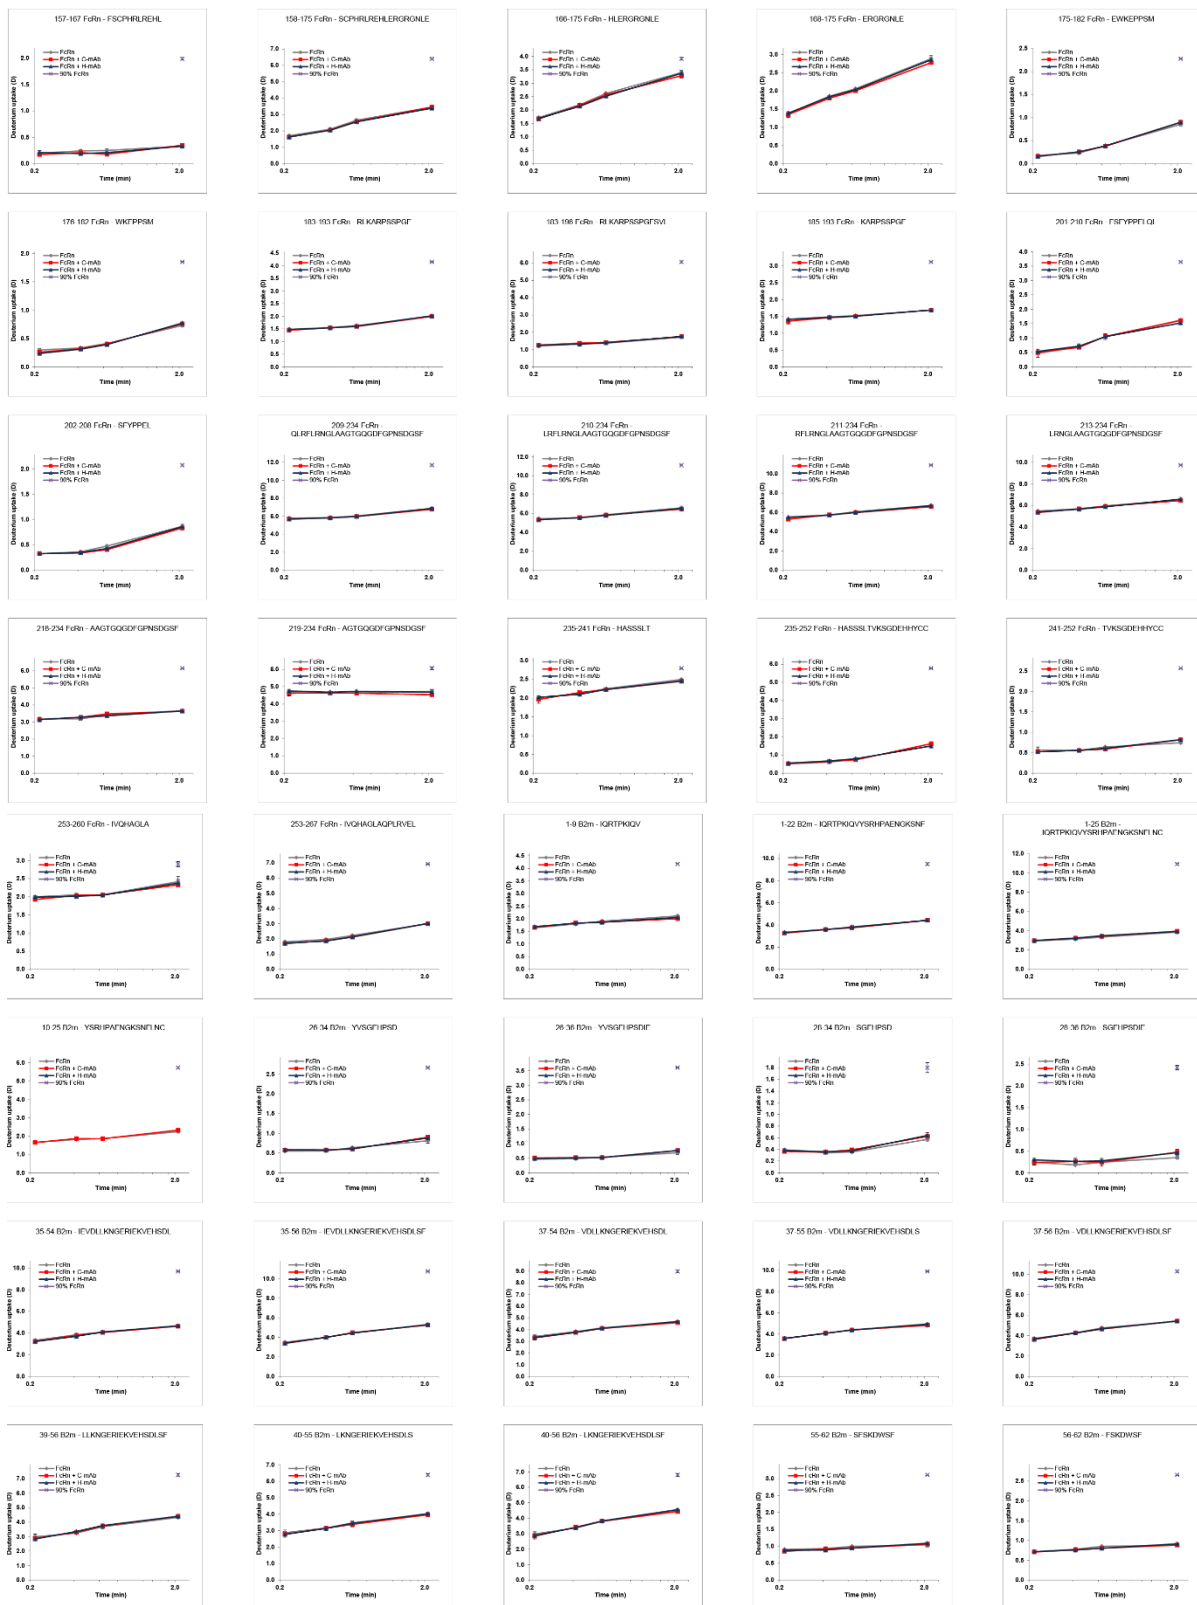

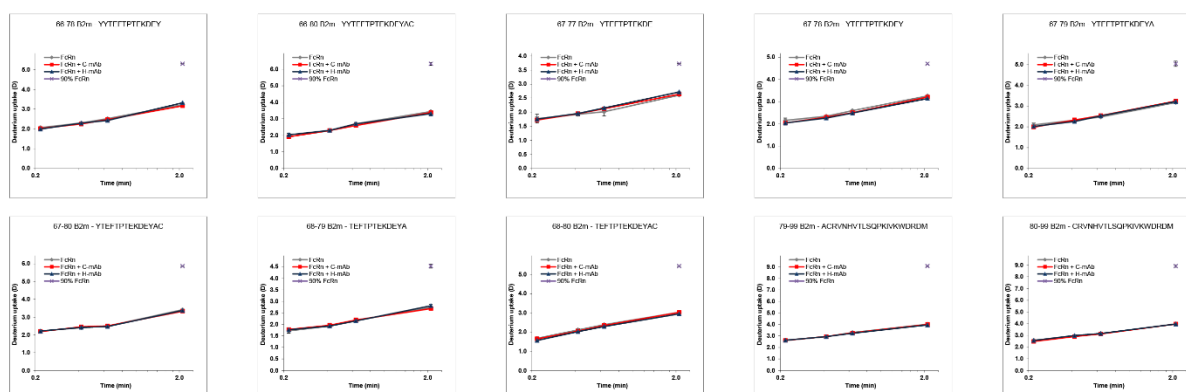

**Supporting Figure S14: HDX plots of FcRn in the absence and presence of either H-mAb or C-mAb (exchange time: 13 s to 2.09 min).** Absolute deuterium incorporation is plotted as a function of time for FcRn (*grey lines*), FcRn in the presence of C-mAb (*red lines*) and FcRn in the presence of H-mAb (*blue lines*). Maximally labelled (90 %) control samples are plotted as *purple crosses* at the longest time points. SD is plotted as error bars (only slightly visible). (n = 3 for all data points).

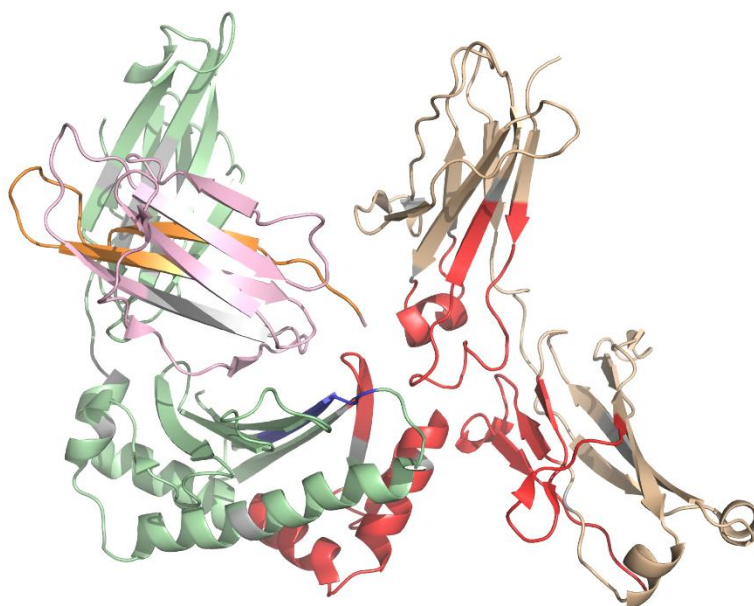

**Supporting Figure S15: Conformational response of complex formation between FcRn and C-mAb.** Differences in HDX mapped onto the crystal structure of FcRn in complex with Fc-YTE ( $\alpha$ -domain: *pale green*,  $\beta$ 2m: *light pink*, Fc-YTE: *wheat*, PDB ID: 4N0U). Regions in the  $\alpha$ -domain and  $\beta$ 2m of FcRn displaying a significant protection from exchange in the presence of H-mAb or C-mAb are colored *orange* and *red*, respectively. Regions displaying a significant deprotection from exchange in the presence of H-mAb or C-mAb are colored *blue*. Regions in the Fc-part of C-mAb displaying a significant protection from exchange in the presence of FcRn are colored *red*, while regions for which no HDX information could be obtained are colored *grey*.



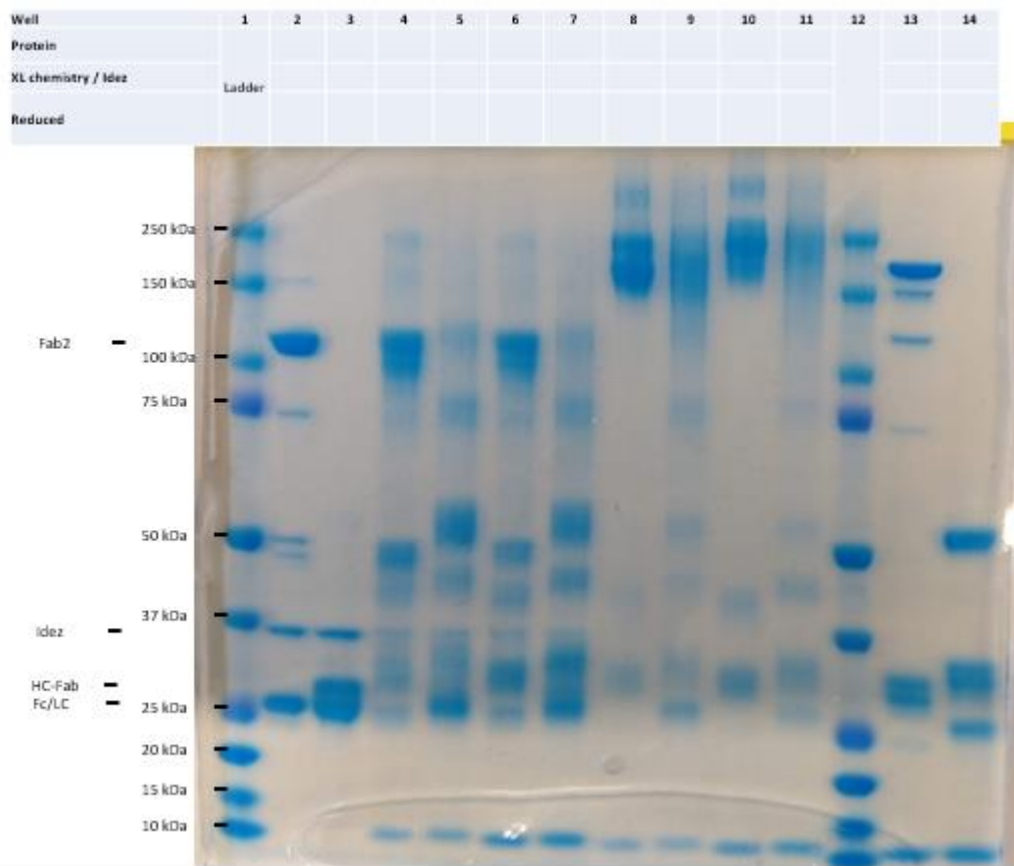

**Supporting Figure S16: SDS-PAGE of IdeZ treated C-mAb.** Well 2 (non-reduced conditions) and 3 (reduced conditions) illustrate the successful cleavage of C-mAb by IdeZ.

## Supplemental References

1. Rice, P., Longden, I. & Bleasby, A. EMBOSS: the European Molecular Biology Open Software Suite. *Trends Genet* **16**, 276–7 (2000).
2. Oganessian, V. *et al.* Structural insights into neonatal Fc receptor-based recycling mechanisms. *J Biol Chem* **289**, 7812–7824 (2014).
3. Altschul, S. F. *et al.* Gapped BLAST and PSI-BLAST: a new generation of protein database search programs. *Nucleic Acids Res* **25**, 3389–402 (1997).
4. Altschul, S. F. *et al.* Protein database searches using compositionally adjusted substitution matrices. *FEBS J* **272**, 5101–9 (2005).
